# Supplementary material
Source: PubMed Central journal article supplement (PMC4459908)
Supplement: NIHMS671383-supplement-1.pdf [file NIHMS671383-supplement-1.pdf]

Elsevier Editorial System(tm) for Journal of Biomechanics  
Manuscript Draft

Manuscript Number: BM-D-15-00243

Title: The Mechanical Role of the Cervix In Pregnancy

Article Type: Special Issue Article

Keywords: cervix; pregnancy; preterm birth

Corresponding Author: Dr. Kristin Myers, PhD

Corresponding Author's Institution: Columbia University

First Author: Kristin Myers, PhD

Order of Authors: Kristin Myers, PhD; Helen Feltovich, MD; Edoardo Mazza, PhD; Joy Vink, MD; Michael Bajka, MD; Ronald J Wapner, MD; Timothy J Hall, PhD; Michael House, MD

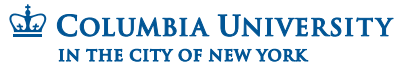

**Department of Mechanical Engineering**  
The Fu Foundation  
School of Engineering & Applied Science  
234 S. W. Mudd Hall, Mail Code 4703  
500 West 120th Street  
New York, New York 10027

**Kristin M. Myers, Ph.D.**  
*Assistant Professor*  
Phone: (212) 854-2957  
Fax: (212) 854-3304  
e-mail: kmm2233@columbia.edu

February 23, 2015

Farshid Guilak, Ph.D.  
Editor-in-Chief  
Departments of Orthopaedic Surgery, Biomedical Engineering,  
and Mechanical Engineering & Material Science  
Duke University Medical Center  
Box 3093  
Med. Sci Res Bldg, Room 375  
Durham, NC 27710

Dear Dr. Guilak:

Enclosed, please find our manuscript for a review article entitled *The Mechanical Role of the Cervix In Pregnancy*, which is co-authored by Helen Feltovich, Edoardo Mazza, Joy Vink, Michael Bajka, Ronald J. Wapner, Timothy J. Hall, and Michael House. All co-authors have made substantial contributions to all of the following: (1) the conception and design of the study, or acquisition of data, or analysis and interpretation of data, (2) drafting the article or revising it critically for important intellectual content, (3) final approval of the version to be submitted.

This review article has been accepted for the special issue on Reproductive Biomechanics by the guest editors David Elad and Steven Abramowitch. Because this is a *review* article, certain data are presented here that have been published elsewhere. However, a review of this type, with an integrated engineering-clinical interpretation of results, is new and is not under consideration elsewhere. The appropriate citations and copyright permissions from the respective journals have been provided. Please do not hesitate to contact me if you need additional information.

Warm Regards,

Kristin M. Myers, Ph.D.

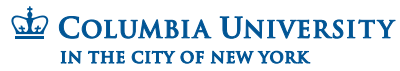

**Department of Mechanical Engineering**  
The Fu Foundation  
School of Engineering & Applied Science  
234 S. W. Mudd Hall, Mail Code 4703  
500 West 120th Street  
New York, New York 10027

**Kristin M. Myers, Ph.D.**  
*Assistant Professor*  
Phone: (212) 854-2957  
Fax: (212) 854-3304  
e-mail: kmm2233@columbia.edu

February 20, 2015

To Whom It May Concern:

This article has already been accepted for the special issue on Reproductive Biomechanics.

Sincerely,

Kristin M. Myers, Ph.D.

## The Mechanical Role of the Cervix In Pregnancy

Kristin M. Myers<sup>a,1</sup>, Helen Feltovich<sup>b,c</sup>, Edoardo Mazza<sup>d</sup>, Joy Vink<sup>e</sup>, Michael Bajka<sup>f</sup>, Ronald J. Wapner<sup>e</sup>, Timothy J. Hall<sup>c</sup>, Michael House<sup>g</sup>

<sup>a</sup>*Department of Mechanical Engineering, Columbia University, New York, NY, U.S.A.*

<sup>b</sup>*Department of Obstetrics and Gynecology, Intermountain Healthcare, Provo, UT, U.S.A.*

<sup>c</sup>*Department of Medical Physics, University of Wisconsin, Madison, WI, U.S.A.*

<sup>d</sup>*Department of Mechanical and Process Engineering, ETH Zurich, & EMPA Dübendorf, Switzerland*

<sup>e</sup>*Department of Obstetrics and Gynecology, Columbia University Medical Center, New York, NY U.S.A.*

<sup>f</sup>*Department of Obstetrics and Gynecology, University Hospital of Zurich, Switzerland*

<sup>g</sup>*Department of Obstetrics and Gynecology, Tufts Medical Center, Boston, MA, U.S.A.*

---

### Abstract

Appropriate mechanical function of the uterine cervix is critical for maintaining a pregnancy to term so that the fetus can develop fully. At the end of pregnancy, however, the cervix must allow delivery, which requires it to markedly soften, shorten and dilate. There are multiple pathways to spontaneous preterm birth, the leading global cause of death in children less than 5 years old, but all culminate in premature cervical change, because that is the last step in the final common pathway to delivery. The mechanisms underlying premature cervical change in pregnancy are poorly understood, and therefore current clinical protocols to assess preterm birth risk are limited to surrogate markers of mechanical function, such as sonographically measured cervical length. This is what motivates us to study the cervix, for which we propose investigating clinical cervical function in parallel with a quantitative engineering evaluation of its structural function. We aspire to develop a common translational language, as well as generate a rigorous integrated clinical-engineering framework for assessing cervical mechanical function at the cellular to organ level. In this review, we embark on that challenge by describing the current landscape of clinical, biochemical, and engineering concepts associated with the mechanical function

---

<sup>1</sup>Corresponding Author, Email Address: kmm2233@columbia.edu (Kristin M. Myers)

of the cervix during pregnancy. Our goal is to use this common platform to inspire novel approaches to delineation of normal and abnormal cervical function in pregnancy.

*Keywords:* cervix, pregnancy, preterm birth

---

## 1. Introduction

The cervix is contiguous with the lower part of the uterus. Its proximal portion is located in the abdomen and its distal portion in the vagina. It has a narrow central canal which runs along its entire length, connecting the uterine cavity and the lumen of the vagina. The opening of this canal into the uterus is called the internal os and the opening into the vagina the external os (Fig. 1A). During pregnancy, the primary biomechanical function of the cervix is to maintain the fetus within the uterus. This requires withstanding multiple forces from the uterus, including the weight of the growing fetus and amniotic sac, as well as passive pressure from the uterine wall. Then, in a dramatic reversal of roles, the cervix markedly softens, shortens and dilates to allow delivery of the fetus. Shortly after delivery, the cervix reforms into its previous shape and consistency. How the cervix manages these complex dynamic changes is an interesting and understudied biomechanics problem.

Critical problems can occur when the timing and extent of the biomechanical changes are altered. Specifically, premature softening, shortening and dilation, which may be considered early mechanical failure, occurs in cases of spontaneous preterm birth (sPTB). The underlying pathophysiology of these changes is poorly understood despite that preterm birth affects 15 million babies annually, is the leading cause of childhood (<5yo) death, and in 2013 was responsible for 1 million deaths (World Health Organization, 2014). The rate of preterm birth has not been significantly decreased by 2 decades of intense research effort into its pathophysiologies and associated molecular mechanisms. We believe this lack of progress is partly due to lack of crosstalk between clinicians, engineers and basic scientists, and that progress will require multidisciplinary collabora-

tion between previously distinct areas of expertise such as clinical obstetrics and engineering.

To begin that dialogue, here we provide an engineering framework for studying the mechanical function of the cervix during pregnancy. The main steps  
30 include modeling the material behavior of the cervix, characterizing the pelvic anatomy, capturing the appropriate contact conditions between the pelvic soft tissues, and understanding the relevant loading and boundary conditions. Accomplishing this is a challenge because, in addition to understanding the basic material and anatomical parameters, one must consider the changes that occur  
35 throughout pregnancy to accommodate the growth and ultimate delivery of the fetus. However, overcoming these engineering challenges could lead to a better understanding of normal and pathological cervical deformation.

## 2. The Clinical Problem of Preterm Birth

### 2.1. Scope of the Problem

40 Preterm birth is defined as delivery between 20 weeks and 36 weeks + 6 days gestation. Medically indicated preterm birth may result from maternal factors (e.g. preeclampsia or placenta previa) or fetal factors (e.g. oligohydramnios or growth restriction). Spontaneous preterm birth (sPTB) was formerly divided  
45 into two general categories, namely *cervical dysfunction (cervical insufficiency* or *cervical incompetence)* or *preterm labor* (typically thought to be the result of intrauterine infection or bleeding). A more current understanding is that sPTB from all causes can be seen as part of an extremely complex continuum involving multiple phenotypes (Barros et al., 2015; Solomon and Iams, 2014). The etiology of sPTB is multifactorial, involving diverse precipitating factors such as infection  
50 & inflammation, bleeding, poor nutrition, demographics, stress, ethnicity & race, genetic predispositions and many others, all presumably with individual, and overlapping, molecular mechanisms (Gravett et al., 2010). A recent attempt to categorize phenotypes of preterm birth showed that approximately 25% of

these births are neither medically indicated nor associated with any known  
55 phenotype (Barros et al., 2015).

Organizations such as the March of Dimes have recently celebrated a decline  
in the preterm birth rate (from 12.8% in 2006 to 11.4% by 2013), but data from  
the Centers for Disease Control shows the sPTB rate in 2012 was nearly identi-  
cal to that in 1997 (Martin et al., 2013; Schoen et al., 2014; Solomon and Iams,  
60 2014). Strategies to address known risk factors (e.g. genitourinary infection and  
poor nutrition) have been ineffective, as have drug therapies targeted against  
uterine contractions, infection, or inflammation (Gravett et al., 2010; Solomon  
and Iams, 2014). The American College of Obstetricians and Gynecologists and  
the Society for Maternal-Fetal Medicine promote intramuscular progesterone  
65 treatment in patients with a history of sPTB, and vaginal progesterone supple-  
mentation or cerclage (a suture tied around the cervix) in patients with a short  
cervix in the current pregnancy (American College of Obstetricians and Gyne-  
cologists, 2012; Society for Maternal-Fetal Medicine Publications Committee,  
2012). Importantly however, the decline in preterm birth has been attributed  
70 primarily to provider education, which has resulted in fewer nonmedically in-  
dicated deliveries < 39 weeks, fewer teenage pregnancies, less smoking in preg-  
nancy, and fewer twin and triplet pregnancies (Schoen et al., 2014; Solomon and  
Iams, 2014). Progesterone supplementation and cerclage in selected patients are  
“probably contributing” according to a 2015 review (Schoen et al., 2014), but  
75 this is obviously unclear, as are the mechanisms by which these treatments work,  
which must contribute to the reason current interventions are ineffective in the  
vast majority of patients (American College of Obstetricians and Gynecologists,  
2012; Conde-Agudelo et al., 2013; Grobman et al., 2012).

As stated recently by Norman and Shennan, the fact that 95% of sPTB  
80 is intractable to current therapies suggests that substantial further research  
is needed (Norman and Shennan, 2013). An understanding of the molecular  
mechanisms of the multiple pathways to sPTB is essential to the develop-  
ment of etiologic- and patient-specific interventions for patients at high risk  
and avoidance of unnecessary and potentially detrimental treatment in those at

85 low risk (Feltovich et al., 2012; Iams and Berghella, 2010). We think the cervix is the logical place to start this investigation because cervical ripening is the last step before labor & delivery in the sPTB pathway, the final common denominator of a multitude of overlapping etiologies (Gracie et al., 2011; Gravett et al., 2010).

90 *2.2. The Role of the Cervix in PTB and the Importance of Cervical Remodeling*

Clinicians use terms such as *softening*, *shortening*, *funneling*, *effacing*, and *dilatating* to describe the cervical deformation that occurs during pregnancy (Fig. 2). Collectively, these changes are called *cervical remodeling* and refer to both the tissue’s intrinsic material property changes and its resultant anatomical changes. Mouse models demonstrate a distinct separation between an early phase of remodeling that starts soon after conception and continues through delivery (*cervical softening*) and a later phase, near delivery, that involves rapid, marked softening and shortening (*cervical ripening*) (Akgul et al., 2012; Holt et al., 2011; Mahendroo, 2012; Read et al., 2007; Timmons et al., 2010a; Word et al., 100 2007). This process is not yet well characterized in human pregnancy. As in the mouse, cervical softening in human pregnancy begins early, a fact that was exploited to detect pregnancy as early as 6 weeks of gestation in the 19th century before diagnostic blood and urine tests were developed. Recent *in vivo* mechanical interrogation of the cervix (Badir et al., 2013a; Parra-Saavedra et al., 105 2011) supports the clinical finding of early, progressive cervical softening (see Section 4.2.2). Starting in mid-pregnancy, the normal human cervix begins to shorten until delivery, confirmed by longitudinal study of ultrasound cervical length (Iams et al., 1996). In addition, there is a clear relationship between cervical softening and the organization and composition of its extracellular matrix (ECM); specifically, cervical softening and shortening relate to dysfunctional 110 ECM remodeling (House et al., 2009b).

Despite this, clinical assessment of softening remains entirely subjective; the clinician describes the cervix as *soft*, *medium*, or *firm* (Bishop, 1964). Compounding the matter, they often use the terms *softening* and *ripening* and *re-*



115 *modeling* interchangeably. This imprecision obscures the clinician’s ability to effectively describe a patient’s clinical findings to another clinician, let alone someone outside of the obstetric profession. To the engineer, *cervical softness* is a material property that must be defined with appropriate constitutive equations and *cervical shortening* is a tissue deformation that results from an evolving  
120 three-dimensional (3D) stress state and the intrinsic remodeling of the materials constituents (Fernandez et al., 2015; House et al., 2012, 2013; House and Socrate, 2006; Paskaleva, 2007). However, the engineer currently has no effective means to apply these definitions to the clinical situation because of the language mismatch between clinicians and basic scientists. This obscures the search for  
125 specific markers of possible pathogenic processes, such as abnormal tissue material property changes or abnormal anatomical considerations. In other words, a common language seems fundamental to progress toward understanding the problem of spontaneous preterm birth.

### 3. The Multi-Scale Mechanical Environment of Pregnancy

130 Studying and characterizing reproductive organs in real-time throughout gestation is understandably challenging. Pregnancy is a protected environment and accessing organs to measure either geometry or material properties during this time is difficult. There is a wide range of biologic length scales that determine the structural response of the reproductive organs during pregnancy  
135 (Fig. 1A). These factors include features of the pelvic anatomy and the hierarchal material characteristics of the cervix and its surrounding tissues, from the collagen fibrils ( $\sim 10\text{-}500\text{nm}$ ) bundling together to form collagen fibers ( $\sim 1\text{-}500\mu\text{m}$ , Fig. 1C) and the collagen fibers bundling together in a preferred anatomic direction to form an overall tissue ultrastructure ( $\sim 1\text{-}10\text{mm}$ , Fig. 1B).

140 Insight into the physiologic loads experienced during pregnancy and the load-carrying capability of the cervix have been derived from finite element models (Fernandez et al., 2015; House et al., 2012, 2013; Mahmoud et al., 2013; Paskaleva, 2007), mechanical and biochemical studies of *ex vivo* tissue spec-

imens (Conrad et al., 1980; Conrad and Ueland, 1976, 1979; Fernandez et al.,  
145 2013; Gan et al., 2014; Myers et al., 2008, 2010; Oxlund et al., 2010a,b; Petersen  
et al., 1991; Rechberger et al., 1988; Yao et al., 2014), *in vivo* mechanical and  
biochemical interrogations of the cervix (Badir et al., 2013a; Bauer et al., 2007;  
Feltovich et al., 2012; Feltovich and Hall, 2013; Feltovich et al., 2010; Hee et al.,  
2014; House et al., 2009a, 2005; Hricak et al., 1990; Maldjian et al., 1999; Mazza  
150 et al., 2006, 2013; Parra-Saavedra et al., 2011), and theoretical mechanics (Liao  
et al., 2014; Myers and Ateshian, 2014; Paskaleva, 2007). At the present time,  
there is no single set of correlating geometric and material property data from  
a single pregnant patient throughout gestation.

### 3.1. Anatomy of the Pregnant Pelvis Organ & Physiologic Loading

155 Knowledge of the 3D anatomy of the cervix and surrounding structures is  
essential for a comprehensive understanding of the biomechanical mechanisms  
leading to clinically-observed cervical shortening (House et al., 2013). A *short*  
*cervix*, associated with an increased risk of sPTB, is clinically defined as less  
than 25 mm (To et al., 2001). An MRI study of the 3D geometry of the pelvis  
160 illustrates the diverse range of the volumetric dimensions of the uterus and the  
cervix (House et al., 2009a). The cervix is generally 3 cm long and 2.5 cm in di-  
ameter, although these dimensions vary considerably between patients depend-  
ing on age, number of previous births, and the menstrual cycle (Bauer et al.,  
2007). The cervix and upper vagina are supported in the pelvis by the cardi-  
165 nal and uterosacral ligaments, which maintain the position of the cervix during  
uterine growth (Ramanah et al., 2012). Within the uterus, the fetal membranes  
are in direct contact with the superior surface of the cervix at the internal os.  
(Fig. 1A)

Both magnetic resonance imaging (MRI) and ultrasound (US) imaging stud-  
170 ies suggest the anatomical structure most essential to normal cervical function is  
the internal os. Sonographic images of the cervix reveal that cervical shortening  
invariably begins at the internal os (Ziliani et al., 1995), where the cervix starts  
to dilate, leading to a *funneled* cervical canal (Fig. 2). Early finite element anal-

ysis (FEA) demonstrate this clinically-observed deformation pattern showing  
175 that the internal os opposes the lateral pull of the uterine wall and the hydro-  
static forces of the uterine cavity (Fernandez et al., 2015; House et al., 2012,  
2013; Paskaleva, 2007). It is viewed that the internal os dilates first because tis-  
sue stresses are higher there compared with the external os (House et al., 2013),  
and the external os is not significantly loaded until the cervix has significantly  
180 shortened (Fernandez et al., 2015). Building FEA models is difficult because of  
the complexity of pregnancy-related anatomy, incomplete data on tissue proper-  
ties and the difficulty in defining appropriate boundary conditions and contact.  
A full validation of these FEA models are still needed, but hypotheses can still  
be made about the key mechanical factors that influence the load-carrying capa-  
185 bility of the cervix during pregnancy. These factors include: cervical material  
properties, cervical geometry, fetal membrane properties and adhesion, static  
loading, and uterine contractions.

*Cervical Material Properties.* The load-bearing region of the cervix is its dense  
collagen-rich core, called the cervical stroma (see Section 3.2). Its mechanical  
190 load bearing properties arise from the hierarchal organization of its collagen  
network. The material response of the cervical tissue to loading is nonlinear,  
anisotropic, and time-dependent (see Section 4). During pregnancy, the stroma  
undergoes a complex growth and remodeling process that is incompletely under-  
stood (Myers and Ateshian, 2014). The outcome of cervical remodeling is tissue  
195 that is orders of magnitude softer during pregnancy compared with nonpregnant  
tissue (Table 1) (Conrad and Ueland, 1976; Myers et al., 2008, 2010; Rechberger  
et al., 1988; Yao et al., 2014). Premature softening is associated with preterm  
shortening and sPTB, but it is not clear how these material characteristics of  
the cervix influence its mechanical function under *in vivo* loading conditions.

200 *Cervical Geometry.* The 3D geometry of the cervix and the uterocervical angle  
has an important effect on the load distribution and stretch pattern within the  
internal os (Fernandez et al., 2015; Paskaleva, 2007). Large anatomical changes  
occur with fetal growth and these changes are associated with changes in cervical

length, cervical volume, and uterocervical angle (House et al., 2009a). A better  
205 understanding of relationships between anatomical geometry and cervical load-  
ing has direct clinical relevance. For example, modification of the uterocervical  
angle was postulated to be the mechanism of PTB prevention for the Arabin  
pessary in recent clinical trials (Goya et al., 2012).

*Fetal Membrane Material Properties and Adhesion to the Lower Uterine Seg-*  
210 *ment.* An under-appreciated factor that influences the amount of stress in  
the cervical tissue is the fetal membrane. The degree of adhesion between  
the fetal membrane and lower uterine segment and the material properties  
of the fetal membrane influence the amount of load that is placed on the  
cervix (Fernandez et al., 2015; Paskaleva, 2007). Simulation reveals that load  
215 sharing occurs between the membrane and cervix when the interface is in-  
tact (Fernandez et al., 2015; Paskaleva, 2007) and when the stiffness of the fetal  
membrane is high (Fernandez et al., 2015). When the adhesion is disrupted or  
if the fetal membrane stiffness decreases, cervical stresses are increased. We  
expect a better understanding of the mechanical role of the fetal membrane  
220 will help clarify 1) how the cervix shortens in response to fundal pressure (the  
*dynamic* cervix) and 2) the mechanics of membrane prolapse, which is observed  
in cases of premature cervical shortening.

*Static loading.* In the absence of the uterine contractions, the cervix is loaded  
by intrauterine pressure and gravity. In addition, growth of the amniotic sac  
225 results in tensile stresses from the uterine wall. These forces also depend on the  
support action of pelvic floor structures and abdominal wall. We hypothesize  
that static loading through a combination of uterine growth, hydrostatic pres-  
sure and gravity are the dominant loads that cause cervical shortening. Most  
patients with cervical shortening show no clinical signs of preterm uterine con-  
230 tractions. A better understanding of these static loads is critically needed for a  
better understanding of cervical deformation.

*Uterine contractions.* Although uterine contractility is clearly important for preterm cervical changes, many patients with preterm uterine contractions do not develop cervical shortening. In contrast, cervical shortening is often seen  
235 when preterm contractions are not prominent. An explanation for these contrasting observations is lacking and highlights a significant knowledge gap. An important goal of future efforts will be study the relative contributions of static loading and uterine contractility and their relative contribution to cervical shortening.

### 240 3.2. Cervical Stroma ECM Components & Remodeling

Along with anatomical and loading considerations, the biological composition of the cervix and its surrounding tissues play key roles in how the weight of the fetus will be supported. The load-bearing qualities of these hydrated soft tissues are due to the ECM of the stroma. The cervix is a layered structure with  
245 a large core of dense connective tissue called the stroma. The cervical ECM components are maintained by interspersed cervical fibroblasts and smooth muscle cells, where the ECM remodels during pregnancy. (A review of human cervical ECM is presented by House et al. (House et al., 2009b), with a summary and update of key ECM features and open research questions given here.)

250 The stroma is primarily hydrated, approximately 75% to 80% for non-pregnant and 85% for term pregnant tissue (House et al., 2009b). Its ECM is composed of a preferentially-aligned (Aspden, 1988; Gan et al., 2014) and crosslinked (Zork et al., 2014) collagen network that is embedded in a viscous groundsubstance of glycosaminoglycans (GAGs) (Myers et al., 2009; Osmers  
255 et al., 1993; Rechberger et al., 1988; Shimizu et al., 1980; Uldbjerg et al., 1983). The type and amount of collagen crosslinking and GAGs, the directionality and dispersion of collagen fibers, the relative amount of cells versus connective tissue, and the content of other matricellular proteins are still being elucidated for nonpregnant and pregnant tissue. The majority of studies have been conducted  
260 on *ex vivo* hysterectomy samples, which are limited to nonpregnant tissue and rare cases of cesarean hysterectomy. ECM remodeling characteristics for human

tissue during pregnancy are largely unknown because getting access to the entire cervix, from internal to external os, is rare. Most ECM remodeling studies have been conducted on rodent models of pregnancy, which are hypothesized to have similar ECM changes as humans (Akgul et al., 2012; Akins et al., 2010, 2011; Holt et al., 2011; Mahendroo, 2012; Timmons et al., 2010b), although comparison between animal models and humans is lacking.

### 3.2.1. Cervical Collagen

The cervical collagen fiber network is a collection of entangled and crosslinked collagen fibers, where deformation mechanisms most likely occur at length-scales ranging from the molecule to the tissue ( $\sim 10\text{nm}$ - $10\text{mm}$ ). According to standard colorimetric biochemical assays of biopsy and hysterectomy tissue samples, the collagen content (Types I and III) can range from 54-77% of the tissue's dry weight (House et al., 2009b). Reports on the collagen content on term pregnant tissue vary greatly, with reports stating that the collagen content does not decrease during pregnancy (Myers et al., 2009) and reports from others stating it can decrease up to 40% (Uldbjerg et al., 1983). Interestingly, collagen content per dry weight for nonpregnant tissue taken at the internal and external os measured via ultra performance liquid chromatography-electrospray ionization tandem mass spectrometry (UPLC-ESI-MS/MS) is measured to be 34% (Zork et al., 2014). Again, it is unclear why there is such a discrepancy in the reported data for collagen content. Sample size, location, and preparation can answer some of these questions. A large scale mapping study of the collagen network is currently underway (Gan et al., 2014; Zork et al., 2014).

Collagen fiber bundles arrange themselves within the cervix according to anatomical directions (Fig.1B). The main feature of this fiber ultrastructure is the circumferential band of fibers circling around the inner canal. Early reports suggest there are zones of preferential collagen fibers, with a middle zone of circumferential collagen and an inner and outer zone of fibers parallel to the inner canal (Aspden, 1988; Weiss et al., 2006). The existence and size of these zones are still being elucidated for the human cervix in both the nonpregnant

and pregnant state. Early reports of the collagen organization of the pregnant tissue show that the collagen fibers still maintain their preferential direction, but they are more disorganized and dispersed about the main fiber direction (Gan et al., 2014).

The collagen fibers themselves have a characteristic wave and crimp (Fig. 1C) that influence the nonlinearity of the material response. The fibers are composed of collagen fibrils, which are composed of crosslinked triple-helix collagen molecules. The amount and type of collagen crosslinks are still being elucidated. A recent UPLC-ESI-MS/MS study reveals that nonpregnant tissue contains a mix of mature trivalent crosslinks [pyridinoline (PYD) & deoxypyridinoline (DPD)], immature divalent crosslinks [dihydroxylysinoxidation product (DHLNL)], and the nonenzymatic advanced glycation end product pentosidine [PEN] (Fig. 1D) (Zork et al., 2014). On a mole-per-mole basis the collagen crosslink density for nonpregnant tissue is 0.123, 0.045, 0.094, and 0.005 for PYD, DPD, DHLNL, and PEN, respectively (Zork et al., 2014). The mature crosslinks are hypothesized to confer collagen fiber stiffness (Marturano et al., 2014), where an increase in collagen crosslinks may cause an alteration to the magnitude and nonlinearity of the collagen fiber material response. These crosslinks have yet to be measured for pregnant human tissue and correlated to mechanical properties for human tissue.

Cervical remodeling during pregnancy has been measured mainly in rodent tissue and in some human tissue studies (Akins et al., 2011; Danforth, 1983, 1947; Danforth et al., 1960, 1974; Holt et al., 2011; Leppert, 1992, 1995, 1998; Timmons et al., 2010b; Word et al., 2007; Yoshida et al., 2014a,b), where cervical softening during pregnancy is shown to depend on alterations in the collagen fiber organization, collagen fiber crosslinking, and the GAG and water content. In our preliminary collagen studies, we find evidence of collagen remodeling during pregnancy at multiple hierarchical length-scales of the collagen fiber network. Interestingly, the total collagen content per dry weight is thought to not change throughout remodeling in both humans (Myers et al., 2009) and mice (Akins et al., 2011; Yoshida et al., 2014a). Instead, pregnant human tissue

is more soluble in weak acids indicating a reduction of collagen crosslinks (Myers et al., 2009). In mouse cervical tissue, there is a significant decrease in mature crosslinks (pyridinoline [PYD] and deoxypyridinoline [DPD]) during the *cervical softening phase* in early pregnancy (Yoshida et al., 2014a). This collagen crosslink decrease is accompanied by a decrease in the structural stiffness of whole tissue specimens. After this early softening stage, there is a continued decrease in mechanical properties as gestation progresses but no further decrease in cervical collagen crosslinking density. Hence, this finding indicates that different mechanisms take over in the later stages of cervical remodeling to further soften the tissue. These collagen crosslinking changes remain to be determined for human tissue.

### 3.2.2. *Glycosaminoglycan Ground Substance*

The contents of the ground substance are still being elucidated, and the role of glycosaminoglycans (GAGs) remain to be determined. Cervical GAGs are present either in the form of proteoglycans (e.g. dermatan sulfate in decorin), or they are embedded in the matrix without a core protein (e.g. hyaluronic acid (HA)) (Myers et al., 2009; Osmers et al., 1993; Shimizu et al., 1980; Uldbjerg et al., 1983). The decorin acts as a collagen organizer, and in other load-bearing tissues it is responsible for maintaining a uniform collagen fibril diameter and consistent collagen fibril distance (Danielson et al., 1997). In the cervical stroma, the role of HA is to imbibe fluid to maintain the osmotic swelling pressure, counteracting the volume restoring forces of the crosslinked collagen. In pregnancy it is hypothesized that the HA is responsible for increasing the swelling to break up the vulnerable collagen network during the last phase of cervical remodeling just before dilation (Akgul et al., 2012). However, recent evidence shows that there is no change in cervical hydration in HA knock-out mice (Akgul et al., 2014).



## 350 4. Cervical Tissue Mechanical Properties

Characterizing the material behavior of human cervical tissue using either *in vivo* or *ex vivo* methodologies remains a challenge. Each methodology has advantages and drawbacks in terms of its ability to capture tissue remodeling characteristics of pregnant tissue or to obtain enough data to derive fully predictive 3D constitutive material equations. Animal models of pregnancy offer 355 opportunities to test gestation-timed, genetically-altered, or chemically-treated samples. However, it is unclear whether the factors driving tissue remodeling in these animal models are similar enough to humans, e.g. the hormonal landscape and/or the *in vivo* loading state of the cervix (Elovitz and Mrinalini, 2004). 360 Given such challenges, constitutive model development and understanding the mechanical environment of pregnancy must rely on several complementary approaches. Here we describe the conclusions gained from recent reports on the mechanical properties of the human cervix, discuss the validation of multiple results from separate studies, and describe how these results can be used together 365 to draw conclusions about the role of the cervix in pregnancy.

### 4.1. *Ex vivo* Tissue Analysis

*Ex vivo* mechanical tests allow for control over definitions of boundary and loading conditions such that careful analysis of the tissue's stress response to various loading scenarios can be assessed. Age is known to affect the mechanical 370 properties of nonpregnant cervical tissue. Spherical indentation tests reveal that older samples have a lower force response to compressive indentation (Yao et al., 2014), while in another study the uni-axial tensile response to loading for older tissue is higher (Oxlund et al., 2010b). Age is an important factor because most *ex vivo* studies have been conducted on hysterectomy specimens, and the age of 375 the hysterectomy patient is often older than that of a typical pregnant patient. Mechanical testing data on pregnant tissue samples are rare because collecting tissue samples is, of course, difficult. Additionally, pregnant tissue is fragile and tends to damage under specimen preparation and loading. Whole tissue samples

have been obtained and tested from cesarean hysterectomy cases of patients  
380 with placenta accreta, which may not be representative of normal cervical tissue  
because accreta is abnormal growth of the placenta into the uterine wall, and  
it is not known whether similar abnormalities exist within the cervix in these  
cases.

Table 1 summarizes uni-axial tension results reported in the literature for  
385 human cervical tissue. The tangent moduli are calculated as the linear slope of  
the engineering stress versus strain curve. Each study measured this tangent  
at different strain rates and levels of strain. Given that material response of  
cervical tissue is nonlinear and time-dependent, pulling the tissue at various  
rates and measuring the tangent modulus at different strains will influence the  
390 modulus reported. Additionally, because the tissue is known to be anisotropic,  
the direction of testing also influences results. To compare, all results are con-  
verted to MPa and the strain rates and levels are listed. The tangent moduli in  
uni-axial tension for nonpregnant tissue are reported to be in the range 0.0242  
to 40.3 MPa, and the percent change in the moduli from nonpregnant to term  
395 ranges from -62% (Conrad and Ueland, 1976) to -95% (Rechberger et al., 1988)  
and -99.5% (Myers et al., 2010). It is unclear why such a large range in reported  
moduli exist for human cervical tissue. The variation in testing protocols, tis-  
sue age, and parity could explain the orders in magnitude in difference in the  
tangent tensile modulus between the studies. Hence, comparisons can only be  
400 made between samples of the same study and patients with similar obstetric  
backgrounds.

Taking these limitations into account, important key features of the mate-  
rial behavior have been discovered. Human tissue tests reveal that the dense  
collagenous core of the cervix is similar to other load-bearing soft tissues in that  
405 its material response to loading is anisotropic, nonlinear, and time-dependent.  
The main features of cervical tissue behavior are: 1) term pregnant tissue is or-  
ders of magnitude softer than nonpregnant tissue (Table 1), 2) pregnant tissue  
has a higher hydraulic permeability compared to nonpregnant tissue (Fernandez  
et al., 2013), 3) the tensile stress response to deformation is larger than the

410 compression response (Myers et al., 2015, 2008, 2010; Yao et al., 2014), 4) tis-  
sue displays a large amount of stress relaxation after a ramp-hold in deforma-  
tion (Myers et al., 2008, 2010; Petersen et al., 1991; Yao et al., 2014), and 5)  
there is a large range in tissue properties between patients due to diverse ob-  
stetric backgrounds (as seen in Table 1) (Myers et al., 2008, 2010; Oxlund et al.,  
415 2010a,b; Yao et al., 2014). Continued mechanical testing is needed to determine  
the extent of anisotropy, heterogeneity, and time-dependent visco- or poroelas-  
tic deformation mechanisms on the material behavior of the tissue at different  
length and time scales. Once these challenges are overcome and an appropriate  
constitutive model is derived, datasets in the literature can be better interpreted  
420 and compared.

#### 4.2. *In vivo Tissue Analysis*

*In vivo* interrogation of the cervix during pregnancy allows characterization  
of longitudinal changes over the course of the gestation. The driving motivation  
for the development of *in vivo* tools is both investigational and diagnostic in  
425 nature, where the ultimate clinical goal is to uncover cervical biomarkers that are  
predictive of sPTB. Before this clinical goal is met, engineering challenges must  
be overcome. These challenges include non-invasive design while sufficiently  
probing the tissue and interpretation of results given complex material behavior  
and boundary conditions. Here we review the latest *in vivo* mechanical testing  
430 data on human cervical tissue, and discuss the advances of mechanical aspiration  
and ultrasound on the study of cervical material characterization.

##### 4.2.1. *Balloon Inflation - EndoFlip*

The most recent mechanical testing data for pregnant cervical tissue reports  
the inflation-displacement response of 5 early pregnant and 6 term pregnant  
435 patients, where the inner canal of the cervix was pressurized using a balloon  
inflation device called the EndoFlip (Hee et al., 2014). Because of the position-  
ing of the device in the inner canal, it was able to capture the deformation  
behavior from the internal to the external os. The pressure-displacement re-

sults are interpreted based on a fiber composite material model that assumes  
440 three preferentially aligned fiber families homogeneously distributed throughout  
a thick-walled cylinder (Liao et al., 2014). Fiber directionality is informed by a  
separate set of x-ray diffraction data, which elucidates the fiber directionality  
of the collagen in nonpregnant cervix (Aspden, 1988). The balloon is deployed  
sufficiently slowly such that it is assumed that the transient deformation mech-  
445 anisms have died away.

Comparing pressure-displacement profiles between the early and late preg-  
nancy groups, results indicate cervical softening from early to late pregnancy (Hee  
et al., 2014). Further, inner canal displacement is even along the cervical length  
in the late pregnant patients, suggesting that the external os remodels to the  
450 same extent as the internal os, which conflicts with other studies. This may be  
because balloon inflation response is influenced by the complex boundary condi-  
tions and shape of the cervical anatomy. For example, pressure-displacement re-  
sults are influenced by potential bending of the cervix and the complex interplay  
between the cervix, lower uterine segment, and fetal membrane. This example of  
455 boundary condition interaction highlights the challenges in interpreting *in vivo*  
mechanical testing data. An approach that employs accurate geometric factors  
and additional information in regards to the tissue’s ultrastructure are needed  
to determine comparative tissue material properties. Regardless, these results  
are invaluable because obtaining such data is difficult to accomplish. Combin-  
460 ing these data, along with other evidence, should aid in the determination of  
cervical remodeling characteristics.

#### 4.2.2. Mechanical Aspiration

The aspiration technique is among the few existing quantitative, *in situ* and  
*in vivo* methods to determine biomechanical properties of soft human tissue.  
465 It uses a handheld device applied on the tissue of interest during noninvasive  
procedures, as well as in minimally invasive and invasive surgery. It employs  
a measuring principle called pipette aspiration, originally developed to handle  
cells under the microscope and later to investigate their mechanical properties.

This approach enables local, non-destructive and thus *in vivo*-compatible measurement of soft tissue biomechanical properties. Applications on the liver and  
470 intra-abdominal organs (Hollenstein et al., 2013; Mazza et al., 2007) provide a basis for benchmarking corresponding constitutive model formulations and information about changes related to various pathologies. First aspiration measurements on the cervix were reported in 2009 (Bauer et al., 2009; Mazza et al.,  
475 2006).

*Measurement procedure.* After speculum insertion, visual monitoring via a mini-camera allows gentle placement of the tip of the aspiration tube on the anterior lip of the distal cervix that is protruding into the vagina. The pressure in the tube is reduced by extraction of air through a thin pipe via a peristaltic  
480 pump and the cervical tissue is pulled into the aspiration cylinder through the circular opening (8 mm diameter) until the tissue vault reaches and closes the thin pipe at four millimeters peak extension. The obtained value of the closing (suction) pressure  $p_{cl}$  is a measure of the stiffness of the tissue. During a typical experiment, a (negative) suction pressure of up to 500 mbar is applied. The  
485 on-line version of (Badir et al., 2013a) includes a video showing a representative aspiration measurement on the cervix.

*Results of measurements on the pregnant cervix.* Figure 3 summarizes the results of aspiration measurements at different gestational ages (Badir et al., 2013a,b). Lower values of  $p_{cl}$  correspond to lower stiffness. In a series of 448 measurements in patients throughout pregnancy (n=50) and on nonpregnant subjects  
490 (n=50), stiffness in early pregnancy (first trimester) is significantly lower than in the nonpregnant cervix. Further, the negative pressure needed to deform the cervix ( $p_{cl}$ ) decreases during gestation, indicating a decrease in stiffness. After delivery (average 6 weeks postpartum) consistency recovers to the level of early  
495 pregnancy.

The stiffness in late pregnancy drops by a factor of 5 when compared to the nonpregnant cervix (Figure 3). In (Maurer et al.; Mazza et al., 2013) it is shown that these results are in line with the findings reported by Parra-Saavedra et

al. (Parra-Saavedra et al., 2011) using the cervical consistency index (CCI), a  
500 semi-quantitative measurement of cervical softness obtained by applying pressure to the cervix with a transvaginal probe and quantifying the degree of cervical compression via ultrasound imaging. The time course of biomechanical changes, as indicated by aspiration and CCI measurements, is different from that of cervical length, suggesting that the two approaches might provide different  
505 or complementary information. The results of aspiration measurements can also be used to verify the predictive capabilities of constitutive models of cervical tissue. However, this technique suffers from important limitations which might affect its relevance for both diagnosis and biomechanical characterization, as explained in the following paragraphs.

510 The influence of measurement uncertainties is analyzed in (Badir et al., 2013a) based on corresponding finite element based parametric studies using a neo-Hookean material (Fig. 3). The two factors with influence on the measurement of  $p_{cl}$  are: (i) the friction coefficient between aspirator and cervix, and (ii) the contact force applied when placing the aspirator on the cervix. The values of  $p_{cl}$  are shown to be affected by up to  $\pm 15\%$  due to this uncertainty, which  
515 is in line with evaluations of repeatability of aspiration measurements reported in (Badir et al., 2013a). Thus, part of the scatter associated with  $p_{cl}$  values of each gestational age (Fig. 3) is due to the difficulties of controlling contact conditions between aspirator and cervix. That said, cervical length assessment and  
520 ultrasound based methods (see next section) are subject to similar variability.

Another potential limitation in the context of biomechanical characterization of the cervix is that the aspiration test interrogates a relatively small amount of tissue, and only on the distal cervix. This measurement depends on the properties of cervical tissue up to only 10 mm below the epithelium (Badir et al.,  
525 2013a), shown by the extension of the region with large deformations shown in Figure 3 (axial and circumferential strain). Thus, no conclusions can be drawn about the mechanical properties of the middle or the proximal cervix based on the aspiration measurement, and a constitutive model developed to represent the response of the distal cervix as observed in aspiration experiments fails to

530 represent the mechanical behavior of the bulk organ (Maurer et al.). Consequently, more information is needed in order to predict cervical deformation when subjected to physiological loading.

Further, as shown in Figure 3, the state of deformation is multiaxial, with regions subjected to large elongation and others to large compression, in radial, circumferential and axial directions of the organ. This state of loading is representative of physiological conditions in terms of duration (quasi-static loading) and magnitude (large strains), but not in terms of direction. In fact, the most prominent values of elongation, extending over a large region below the epithelium, are those related to the axial direction (LE-axial in Figure 3), while physiological loading is expected to elongate the cervix mainly in circumferential direction. Positive strains in this direction are present in the aspiration experiment (red area in circumferential strain, Figure 3) but they are confined to the surface, close to the epithelium, where the ECM, does not contain the same high density of collagen fibers as the rest of the organ. For small strains, good agreement was found (Badir et al., 2013a) between the mechanical model parameters obtained from an inverse analysis of the aspiration experiment and the results from *ex vivo* mechanical testing of cervical tissue in (Myers et al., 2010). This might indicate that the findings from aspiration measurements can be used to characterize the non-collagenous part of the ECM, having significant influence on the small strain mechanical response. In other words, characterization of the evolution of this component of the ECM during pregnancy might be relevant clinically, and studies to investigate this are currently underway.

#### 4.2.3. Ultrasound

555 Ultrasound techniques have a distinct advantage in *in vivo* soft tissue assessment because they are noninvasive and the equipment is relatively inexpensive, safe, portable, and provides real-time results. The ECM has been shown to be a major contributing source of backscatter (echo signals) in soft tissue (Hall et al., 2000). Standard ultrasound methods provide grayscale images that are proportional to the echo signal amplitude, but the amplitude, and therefore

560 those images, depend on soft tissue characteristics as well as ultrasound system settings. Quantitative ultrasound (QUS) methods can overcome some of these limitations because they directly address soft tissue characteristics are less reliant on system settings. QUS methods applicable to the cervix can be generally categorized into techniques that are primarily sensitive to changes  
565 in the time-dependent material response of the cervix tissue, tissue hydration status, or ECM (specifically collagen) structure, although these properties are interrelated (Feltovich et al., 2012).

*Palpation-type Elastography.* Palpation-type elastography (quasi-static elastography) typically produces images of mechanical strain, the relative (local) deformation of the tissue. These methods were initially developed for breast imaging  
570 but soon after were extended to the prostate, thyroid and beyond. The basic concept is that an ultrasound *image* (usually the underlying radiofrequency (RF) echo signal or the analytic signal version of the same information) is acquired under an initial loading condition (such as the transducer barely in contact with the tissue).  
575 After a small deformation, another ultrasound *image* is acquired. The source and magnitude of the deformation varies among the systems and tissues of interest. In some cases the deformation is on the order of a few hundred microns at the transducer surface and is typically obtained by lightly pressing on the tissue with the ultrasound transducer. In other cases the deformation is  
580 on the order of a few microns and can be applied in a number of ways (such as quiver of the hand holding the transducer, or physiological motion of the subject or organ). Regardless, the two ultrasound *images* are compared to track motion and calculate strain resulting from the incremental load.

The results of these studies are most easily interpreted when the loading  
585 conditions result in uniform stress fields. One caution is that, because most tissues have nonlinear material behavior, the results of these studies can be highly dependent on loading conditions. In the most successful applications of strain elastography, the clinical task is to detect and characterize a local variation in tissue stiffness (such as a tumor) surrounded by normal tissue. Without the use



590 of numerically-intensive modulus reconstructions (Barbone and Bamber, 2002),  
these methods are not sensitive to overall changes in tissue stiffness. The tech-  
nique has been attempted by several groups on the cervix, all of which found it  
challenging to standardize the transducer force for meaningful data interpreta-  
tion and comparisons between patients (Hernandez-Andrade et al., 2014; Molina  
595 et al., 2012; Swiatkowska-Freund and Preis, 2011). Molina et al. noted no sta-  
tistically significant differences between cervixes except in the precise area that  
received the force from the transducer. Various approaches are currently being  
employed to address this problem of transducer force standardization (Fruscalzo  
et al., 2014; Hee et al., 2013; Hernandez-Andrade et al., 2014).

600 *Shear wave elastography.* The fact that acoustic wave energy is lost as it prop-  
agates through tissue means that there is a net acoustic (radiation) force on  
the tissue. If the intensity of the wave is high enough, and the duration of the  
acoustic pulse long enough, the net force on the tissue will be large enough to  
cause a local (in the location of the acoustic beam) displacement of the tissue  
605 on the order of a few microns. This is sufficient motion to induce a transverse  
wave in the tissue (generally referred to as a shear wave). Since the shear wave  
speed in soft tissue is on the order of 1-10 m/s, and the ultrasound wave travels  
a thousand times faster, ultrasound imaging techniques can be used to monitor  
the propagation of the shear wave and measure its speed. The speed of the  
610 shear wave is, under idealized conditions, proportional to the shear modulus of  
the tissue (Palmeri et al., 2013). Although the results are dependent on initial  
loading conditions due to the nonlinear elasticity of most tissues, the results are  
far less dependent on the skills of the user, unlike palpation-type elastography  
techniques. Further, the methods provide a measure proportional to absolute, as  
615 opposed to relative, stiffness and therefore are well suited to estimating changes  
in overall tissue stiffness (not just local variations in stiffness).

To measure shear wave speeds (SWS) in the cervix, we used a prototype  
transducer (128 element, 3 mm diameter, 14 mm aperture) because the small  
aperture array was essential for these studies given that tissue assessment occurs

620 very close to the transducer surface. Further, the pressure distribution near the  
transducer surface is very complicated and the location of the peak pressure can  
be relatively far away from the beam axis, which can induce a depth-dependent  
bias in shear wave speed estimates. These problems were avoided with this  
transducer. We demonstrated that shear wave speeds (SWS) are sensitive to  
625 the stiffness differences in ripened (softened with a prostaglandin agent used  
clinically for preparing the cervix for invasive procedures or induction of la-  
bor) versus unripened cervical tissue both *ex vivo* and *in vivo* (Carlson et al.,  
2014a,b). Additionally we demonstrated that in the former, SWS estimates vary  
within the cervix (Carlson et al., 2014a), consistent with reported variation in  
630 the ECM based on early studies (Aspden, 1988; Danforth, 1983). An *in vivo*  
feasibility study of this technique before and after cervical ripening for induc-  
tion of labor at term demonstrated a highly statistically significant decrease in  
stiffness (Carlson et al., 2014b). This technique shows promise for assessing cer-  
vical softness, although a significant limitation is that precise acquisition and  
635 prototype equipment seems necessary to make appropriate conclusions. An-  
other is that this technique provides information on the response to small strain  
and high rate of deformation, where additional mechanical tests are needed to  
validate a hyperelastic form of a material constitutive model.

*Attenuation.* Acoustic attenuation is a measure of the rate of loss in acoustic  
640 pressure as a wave propagates. It primarily addresses hydration status, but  
also collagen structure. The mechanisms for loss of acoustic wave energy are  
unknown in the cervix, but it has been proposed that changes in tissue hydra-  
tion and the amount of unbound interstitial material affects attenuation in the  
cervix, thus attenuation would change throughout pregnancy (McFarlin et al.,  
645 2010). Controlled studies in phantoms and animal models have demonstrated  
that attenuation parameters can be accurately measured and the results are in-  
dependent of the imaging system used (Nam et al., 2011; Wirtzfeld et al., 2010;  
Wirtzfeld et al., 2013). Cross-sectional data during human pregnancy showed a  
trend toward decreasing attenuation with gestational age, although there was a

650 very large variance in the attenuation estimates(Labyed et al., 2011).

Our recent studies in nonpregnant ripened versus unripened hysterectomy specimens demonstrated that controlling for expected sources of anatomical variation in collagen structure significantly reduces variance in attenuation estimates (Guerrero et al., 2014). Studies in structurally aligned tissues have shown  
655 that attenuation is dependent on the angle between the acoustic beam and structural orientation (Insana et al., 1992; Mottley and Miller, 1990; Nassiri et al., 1979; Topp and O'Brien, 2000) and attenuation versus steering angle provides evidence for aligned structures in the cervical ECM (presumably collagen). As well, attenuation estimates in nonpregnant ripened versus unripened hysterectomy  
660 specimens correlate with SWS findings.

*Backscatter.* Acoustic backscatter is the formal name for the echo signals (ultrasound waves) received back by an ultrasound transducer after they have been sent into a tissue or phantom. This QUS technique most directly addresses collagen structure. When ultrasound beams are electronically steered  
665 away from normal ( $0^\circ$ ), system-dependent losses occur as some of the echo signal is lost because of changes in transducer sensitivity. This property can be exploited to evaluate tissue microstructure because there will be an increase in backscattered power loss if the beam encounters an anisotropic scatterer (e.g. an aligned, rod-like structure such as collagen), as opposed to if the beam encounters an isotropic scatterer (e.g. sphere, which looks the same from any angle).  
670 The excess backscattered power loss (eBSPL; the difference in the normalized backscattered power from tissue versus spherical scatterers) is a simple method to determine the presence of anisotropic scattering structures in the tissue of interest.

675 As with attenuation estimation, controlled studies in phantoms and in animal models have demonstrated that backscatter parameters can be accurately measured and the results are independent of the imaging system used (Anderson et al., 2010; Nam et al., 2012a,b, 2011). Backscatter parameters have proven useful for monitoring changes in tissues and diagnosing disease (Feleppa et al.,

680 1996; Garra et al., 1989; Insana et al., 1992, 1995). In nonpregnant hysterectomy  
specimens, significant eBSPL suggests evidence for aligned rod-like scattering  
sources in the tissue (presumably collagen) (Feltovich et al., 2010). Our recent  
studies have demonstrated that the eBSPL varies along the length of the cervix,  
consistent with heterogeneity noted with other QUS parameters (SWS and at-  
685 tenuation estimates).

#### 4.3. Comparing Material Properties - *In vivo* vs. *Ex vivo*

Different equilibrium constitutive material models have been used to describe  
cervical *ex vivo* tension and compression uni-axial material behavior (Myers  
et al., 2015, 2008, 2010), the *in vivo* pressure-displacement inner canal response  
690 recorded with the EndoFlip balloon inflation device (Hee et al., 2014; Liao et al.,  
2014), and the *in vivo* aspiration response of the external os of the cervix (Badir  
et al., 2013a,b). The two proposed fiber composite models, a continuously dis-  
tributed fiber model (Myers et al., 2015) and a 3-fiber family model (Liao et al.,  
2014), are similar in that they attempt to account for the cervical collagen ul-  
695 trastructure using early reports of fiber directionality (Aspden, 1988; Gan et al.,  
2014). They differ such that the material model based on the optical coherence  
tomography data and *ex vivo* mechanical tests uses a continuously distributed  
elliptical fiber distribution (EFD) (Gan et al., 2014; Myers et al., 2015), where  
fibers can only sustain tensile stresses, and the 3-fiber family model based on  
700 nonpregnant x-ray diffraction and EndoFlip data uses a fiber network with no  
fiber dispersion and the fiber strain energy density can sustain both tension  
and compression (Aspden, 1988; Hee et al., 2014; Liao et al., 2014). The third  
model, fit to the aspiration data, is a neo-Hookean material, where the tissue  
is assumed to be incompressible (Badir et al., 2013a). This modeling strategy  
705 is suitable because one set of mechanical testing data is considered and the  
collagen ultrastructure is mostly unknown in the pregnancy.

To compare material properties reported in these studies, the principal strain  
response of a thick-walled cylinder under longitudinal compression (Fig. 4) was  
calculated using FEA (methodology reported in (Myers et al., 2015)). Cervical

710 material models and corresponding parameters for the EFD fiber, 3-fiber family,  
and the neo-Hookean models are reported in (Myers et al., 2015), (Liao et al.,  
2014), (Badir et al., 2013a), respectively. Under a uniform compression of the  
cylinder, the 3-fiber family model produces a twist about the inner canal because  
of the helical fibers circumferentially ringing around the inner canal (Aspden,  
715 1988; Liao et al., 2014), whereas the EFD and neo-Hookean materials do not  
produce this twist. Both fiber composite models, with preferential circumferen-  
tial fibers, reduce the amount of circumferential strain. However, because the  
3-fiber family material model do not have fiber reinforcement in the radial di-  
rection, strains in this direction are larger than an EFD prediction with similar  
720 fiber moduli. Additionally, there is a large gradient in the radial and circumfer-  
ential strain for the 3-fiber family model because the 3-fiber families are fully  
aligned with no dispersion. The EFD produces a small strain gradient from  
the inner to the outer radius, and as expected the isotropic neo-Hookean model  
produces the same amount of radial and circumferential strains (0.083, 0.17,  
725 & 0.32 for NP, 1st trimester, 2nd trimester tissue, respectively, under 2 kPa of  
compressive load and 0.05 for 3rd trimester tissue under 0.18 kPa).

These predicted deformation patterns need to be validated with bulk tissue  
mechanical tests. However, overlapping findings from these studies confirm that  
the term pregnant cervix is orders of magnitude softer than the nonpregnant  
730 cervix. Additionally, comparing the nonpregnant *ex vivo* EFD results with  
the *in vivo* EndoFlip and aspirator data, early softening is present in the 1st  
trimester of pregnancy. In terms of longitudinal strain, the results from all three  
models predicted similar values, with 0.18, 0.15, and 0.08 strain throughout the  
cylinder for the EFD, 3-fiber family, and neo-Hookean models, respectively.

## 735 **5. In Summary: Integrating Strategies**

Complementary methods to characterize cervical remodeling during preg-  
nancy can help derive a fully descriptive material constitutive model for tissue  
behavior under mechanical loading. Mechanical characterization methodologies

described here have limitations and advantages. In terms of capturing over-  
all bulk tissue properties during cervical remodeling, *in vivo* QUS methods and  
740 mechanical aspiration offer noninvasive techniques to characterize cervical prop-  
erties during pregnancy. These tools are critical to understand cervical tissue  
changes in early pregnancy and to develop mechanical biomarkers for diagno-  
sis. The major technical advantage of *in vivo* methods is the ability to conduct  
745 longitudinal studies in pregnancy to relate cervical remodeling to clinical out-  
comes. Small studies of biomechanical and QUS parameters in human *ex vivo*  
and *in vivo* tissue support a model of cervical remodeling that is consistent  
with animal studies, specifically, that early softening is primarily due to loss  
of mature collagen crosslinking with preservation of general collagen alignment  
750 (microstructure) while late ripening is associated with marked increase in tissue  
hydration within a vulnerable ECM (Mahendroo, 2012; Yoshida et al., 2014a).

That said, this is a challenging problem and much more information about  
both *ex vivo* and *in vivo* human tissue is necessary for comprehensive under-  
standing of the complex process of cervical remodeling. In terms of constitutive  
755 model development, QUS and mechanical aspiration data are limited by com-  
plex boundary conditions, contact, testing locations, directionality, strain levels,  
and strain rates. *In vivo* mechanical aspiration is currently limited to interro-  
gation of the external os. Conversely, while QUS methods can interrogate the  
entire structure, they involve small strain and high rate of deformation, which  
760 are difficult to interpret on soft anisotropic materials, which in turns makes fit-  
ting a 3-D material constitutive model to *intrinsic tissue material* properties a  
challenge. *Ex vivo* mechanical testing offers insight into the large deformation  
tissue material behavior and allows for predictive material modeling, but *ex vivo*  
mechanical tests are limited by possible tissue damage, possible tissue degrada-  
765 tion, tissue swelling, ill definitions of the tissue micro and ultrastructure, and  
the inability to access pregnant tissue. These drawbacks are apparent in the  
wide range of tensile moduli reported in the literature (Table 1).

Extensive cross-validation of *ex vivo* and *in vivo* methodologies is needed to  
identify meaningful and comparative cervical tissue material properties. This

770 requires overcoming the limitations outlined here, which can certainly be fa-  
cilitated through a multidisciplinary approach, encompassing medical imaging,  
quantitative ultrasound, fresh tissue imaging, *in vivo* mechanical interrogation,  
advanced material modeling, biochemical analysis, and correlation with animal  
models of normal and abnormal cervical remodeling. We hope this approach  
775 will allow reframing of clinical definitions of cervical remodeling and deformation  
based on intrinsic material property changes, and rigorous definitions of mechan-  
ical loading conditions and strain with respect to the reference configuration of  
the cervix. Through combining these individual approaches in a collaborative  
engineering-clinical framework, we hope to begin to develop a biomechanical  
780 rubric that will aid in understanding the mechanical function of the cervix, and  
its role in spontaneous preterm birth.

### **Acknowledgements**

KM, JV, and RW acknowledge the support of the National Science Founda-  
tion BRIGE1125670 award, the Office of the Provost at Columbia University,  
785 and the Columbia University Medical Center Irving Institute for Clinical and  
Translational Research, which is supported by the National Center for Advanc-  
ing Translational Sciences, National Institutes of Health through Grant No.  
UL1 TR000040. MB and EM gratefully acknowledge financial support by Swiss  
National Science Foundation, grant nr. 32003B\_156450/1. HF and TJH grate-  
790 fully acknowledge the support of NIH R21HD063031, NIH R21HD061896, NIH  
R01HD072077 from the Eunice Kennedy Shriver National Institute of Child  
Health and Human Development, and Intermountain Research & Medical Foun-  
dation. The content is solely the responsibility of the authors and does not nec-  
essarily represent the official views of the National Science Foundation, National  
795 Institutes of Health, nor the Swiss National Science Foundation.

### **Conflict of interest statement**

None.

## References

- Akgul, Y., Holt, R., Mummert, M., Word, A., Mahendroo, M., 2012. Dynamic  
800 changes in cervical glycosaminoglycan composition during normal pregnancy  
and preterm birth. *Endocrinology* 153, 3493–3503.
- Akgul, Y., Word, R.A., Ensign, L.M., Yamaguchi, Y., Lydon, J., Hanes, J., Ma-  
hendroo, M., 2014. Hyaluronan in cervical epithelia protects against infection-  
mediated preterm birth. *J Clin Invest* 124, 5481–5489.
- 805 Akins, M., Luby-Phelps, K., Mahendroo, M., 2010. Second harmonic generation  
imaging as a potential tool for staging pregnancy and predicting preterm  
birth. *J Biomed Opt* 15, 026020.
- Akins, M.L., Luby-Phelps, K., Bank, R., Mahendroo, M., 2011. Cervical soft-  
ening during pregnancy: regulated changes in collagen cross-linking and com-  
810 position of matricellular proteins in the mouse. *Bio of Repro* 84, 1053–1062.
- American College of Obstetricians and Gynecologists, 2012. ACOG (2012a)  
practice bulletin no. 130: Prediction and prevention of preterm birth. ameri-  
can college of obstetricians and gynecologists. *Obstet Gynecol* 120, 964–973.
- Anderson, J.J., Herd, M.T., King, M.R., Haak, A., Hafez, Z.T., Song, J.,  
815 Oelze, M.L., Madsen, E.L., Zagzebski, J.A., O'Brien, W.D., Hall, T.J., 2010.  
Interlaboratory comparison of backscatter coefficient estimates for tissue-  
mimicking phantoms. *Ultrasonic Imag* 32, 48–64.
- Aspden, R., 1988. Collagen organization in the cervix and its relation to me-  
chanical function. *Coll Relat Res* 8, 103–112.
- 820 Badir, S., Bajka, M., Mazza, E., 2013a. A novel procedure for the mechani-  
cal characterization of the uterine cervix during pregnancy. *J Mech Behav*  
*Biomed Mater* 27, 143–153.
- Badir, S., Mazza, E., Zimmermann, R., Bajka, M., 2013b. Cervical softening  
occurs early in pregnancy: characterization of cervical stiffness in 100 healthy  
825 women using the aspiration technique. *Prenatal Diagnosis* 33, 737–741.



- Barbone, P.E., Bamber, J.C., 2002. Quantitative elasticity imaging: what can and cannot be inferred from strain images. *Phys Med Biol* 47, 2147–2164.
- Barros, F.C., Papageorgiou, A.T., Victora, C.G., Noble, J.A., Pang, R., Iams, J., Ismail, L.C., Goldenberg, R.L., Lambert, A., Kramer, M.S., et al., 2015. 830 The distribution of clinical phenotypes of preterm birth syndrome: Implications for prevention. *JAMA pediatrics* .
- Bauer, M., Mazza, E., Jabareen, M., Sultan, L., Bajka, M., Lang, U., Zimmermann, R., Holzapfel, G.A., 2009. Assessment of the in vivo biomechanical properties of the human uterine cervix in pregnancy using the aspiration test. 835 *Eur J Obstet Gynecol Reprod Biol* 144, S77–S81.
- Bauer, M., Mazza, E., Nava, A., Zeck, W., Eder, M., Bajka, M., Cacho, F., Lang, U., Holzapfel, G.A., 2007. In Vivo Characterization of the Mechanics of Human Uterine Cervices. *Ann N Y Acad Sc* 1101, 186–202.
- Bishop, E., 1964. Pelvic Scoring for Elective Induction. *Obstet Gynecol* 24, 266.
- 840 Carlson, L.C., Feltovich, H., Palmeri, M.L., Dahl, J.J., Munoz del Rio, A., Hall, T.J., 2014a. Estimation of shear wave speed in the human uterine cervix. *Ultrasound Obstet Gynecol* 43, 452–458.
- Carlson, L.C., Romero, S.T., Palmeri, M.L., Muñoz del Rio, A., Esplin, S.M., Rotemberg, V.M., Hall, T.J., Feltovich, H., 2014b. Changes in Shear Wave 845 Speed Pre and Post Induction of Labor: a Feasibility Study. *Ultrasound Obstet Gynecol* doi:10.1002/uog.14663.
- Conde-Agudelo, A., Romero, R., Nicolaidis, K., Chaiworapongsa, T., O'Brien, J.M., Cetingoz, E., Da Fonseca, E., Creasy, G., Soma-Pillay, P., Fusey, S., Cam, C., Alfirevic, Z., Hassan, S.S., 2013. Reports of Major Impact. *Am J 850 Obstet Gynecol* 208, 42.e1–42.e18.
- Conrad, J.T., Tokarz, R.D., Williford, J.F., 1980. Dilatation of the Uterine Cervix: Connective Tissue Biology and Clinical Management. Raven Press, New York.

- Conrad, J.T., Ueland, K., 1976. Reduction of the stretch modulus of human  
855 cervical tissue by prostaglandin E2. *Am J Obstet Gynecol* 126, 218–223.
- Conrad, J.T., Ueland, K., 1979. The stretch modulus of human cervical tissue  
in spontaneous, oxytocin-induced, and prostaglandin E2-induced labor. *Am  
J Obstet Gynecol* 133, 11–14.
- Danforth, D., 1983. The morphology of the human cervix. *Clin Obstet Gynecol*  
860 26, 7–13.
- Danforth, D.N., 1947. The fibrous nature of the human cervix, and its relation  
to the isthmic segment in gravid and nongravid uteri. *Am J Obstet Gynecol*  
53, 541–560.
- Danforth, D.N., Buckingham, J.C., Roddick, J.W., 1960. Connective tissue  
865 changes incident to cervical effacement. *Am J Obstet Gynecol* 80, 939–945.
- Danforth, D.N., Veis, A., Breen, M., Weinstein, H.G., Buckingham, J.C., Man-  
alo, P., 1974. The effect of pregnancy and labor on the human cervix: changes  
in collagen, glycoproteins, and glycosaminoglycans. *Am J Obstet Gynecol*  
120, 641–651.
- 870 Danielson, K.G., Baribault, H., Holmes, D.F., Graham, H., Kadler, K.E., Iozzo,  
R.V., 1997. Targeted disruption of decorin leads to abnormal collagen fibril  
morphology and skin fragility. *J Cell Biol* 136, 729–743.
- Elovitz, M., Mrinalini, C., 2004. Animal models of preterm birth. *Trends  
Endocrinol Metab* 15, 479–487.
- 875 Feleppa, E., Kalisz, A., Sokil-Melgar, J., Lizzi, F., Liu, T., Rosado, A., Shao, M.,  
Fair, W., Wang, Y., Cookson, M., et al., 1996. Typing of prostate tissue by  
ultrasonic spectrum analysis. *IEEE Trans Ultrason Ferroelectr Freq Control*  
43, 609–619.
- Feltovich, H., Hall, T., Berghella, V., 2012. Beyond cervical length: emerging  
880 technologies for assessing the pregnant cervix. *Am J Obstet Gynecol* , 1–43.

- Feltovich, H., Hall, T.J., 2013. Quantitative imaging of the cervix: setting the bar. *Ultrasound Obstet Gynecol* 41, 121–128.
- Feltovich, H., Nam, K., Hall, T.J., 2010. Quantitative ultrasound assessment of cervical microstructure. *Ultrason Imaging* 32, 131–142.
- 885 Fernandez, M., House, M., Jambawalikar, S., Vink, J., Wapner, R., Zweben, N., Myers, K., 2015. Investigating the Mechanical Function of the Cervix during Pregnancy using Finite Element Models derived from High Resolution 3D MRI. *in-review Comput Methods Biomech Biomed Engin* .
- Fernandez, M., Vink, J., Yoshida, K., Wapner, R., Myers, K., 2013. Direct  
890 Measurement of the Permeability of Human Cervical Tissue. *J Biomech Eng* 135, 021024.
- Fruscalzo, A., Londero, A.P., Fröhlich, C., Meyer-Wittkopf, M., Schmitz, R., 2014. Quantitative Elastography of the Cervix for Predicting Labor Induction Success. *Ultraschall Med* .
- 895 Gan, Y., Yao, W., Myers, K.M., Hendon, C.P., 2014. An automated 3d registration method for optical coherence tomography volumes, in: *Engineering in Medicine and Biology Society (EMBC), 2014 36th Annual International Conference of the IEEE, IEEE*. pp. 3873–3876.
- Garra, B.S., Insana, M.F., Shawker, T.H., Wagner, R.F., Bradford, M., Russell,  
900 M., 1989. Quantitative ultrasonic detection and classification of diffuse liver disease. Comparison with human observer performance. *Invest Radiol* 24, 196–203.
- Goya, M., Pratcorona, L., Merced, C., Rodó, C., Valle, L., Romero, A., Juan, M., Rodríguez, A., Muñoz, B., Santacruz, B., Bello-Muñoz, J.C., Llurba, E.,  
905 Higuera, T., Cabero, L., Carreras, E., Pesario Cervical para Evitar Prematuridad (PECEP) Trial Group, 2012. Cervical pessary in pregnant women with a short cervix (PECEP): an open-label randomised controlled trial. *The Lancet* 379, 1800–1806.

- Gracie, S., Pennell, C., Ekman-Ordeberg, G., Lye, S., McManaman, J.,  
910 Williams, S., Palmer, L., Kelley, M., Menon, R., Gravett, M., Group,  
t.P.O.R., 2011. An integrated systems biology approach to the study of  
preterm birth using “-omic” technology -a guideline for research. *BMC Preg-  
nancy and Childbirth* 11, 71.
- Gravett, M.G., Rubens, C.E., Nunes, T.M., GAPPS Review Group, 2010.  
915 Global report on preterm birth and stillbirth (2 of 7): discovery science.  
*BMC Pregnancy Childbirth* 10 Suppl 1, S2.
- Grobman, W.A., Thom, E.A., Spong, C.Y., Iams, J.D., Saade, G.R., Mer-  
cer, B.M., Tita, A.T.N., Rouse, D.J., Sorokin, Y., Wapner, R.J., Leveno,  
K.J., Blackwell, S., Esplin, M.S., Tolosa, J.E., Thorp, J.M., Caritis, S.N.,  
920 Van Dorsten, J.P., Eunice Kennedy Shriver National Institute of Child Health  
and Human Development Maternal-Fetal Medicine Units (MFMU) Network,  
2012. 17 alpha-hydroxyprogesterone caproate to prevent prematurity in nul-  
liparas with cervical length less than 30 mm. *Am J Obstet Gynecol* 207,  
390.e1–390.e8.
- 925 Guerrero, Q.W., Carlson, L.C., Feltovich, H., Hall, T., 2014. Quantitative  
ultrasound backscatter parameters in the human cervix, in: 2014 IEEE In-  
ternational Ultrasonics Symposium (IUS), IEEE. pp. 224–227.
- Hall, C.S., Scott, M.J., Lanza, G.M., Miller, J.G., Wickline, S.A., 2000. The  
extracellular matrix is an important source of ultrasound backscatter from  
930 myocardium. *J Acoust Soc Am* 107, 612–619.
- Hee, L., Liao, D., Sandager, P., Gregersen, H., Uldbjerg, N., 2014. Cervical  
Stiffness Evaluated In Vivo by Endoflip in Pregnant Women. *PLoS ONE* 9,  
e91121.
- Hee, L., Sandager, P., Petersen, O., Uldbjerg, N., 2013. Quantitative sonoe-  
935 lastography of the uterine cervix by interposition of a synthetic reference  
material. *Acta Obstet Gynecol Scand* 92, 1244–1249.

- Hernandez-Andrade, E., Romero, R., Korzeniewski, S.J., Ahn, H., Auriolles-Garibay, A., Garcia, M., Schwartz, A.G., Yeo, L., Chaiworapongsa, T., Hassan, S.S., 2014. Cervical strain determined by ultrasound elastography and its  
940 association with spontaneous preterm delivery. *J Perinat Med* 42, 159–169.
- Hollenstein, M., Bugnard, G., Joos, R., Kropf, S., Villiger, P., Mazza, E., 2013. Towards laparoscopic tissue aspiration. *Med Image Anal* 17, 1037–1045.
- Holt, R., Timmons, B., Akgul, Y., Akins, M., Mahendroo, M., 2011. The molecular mechanisms of cervical ripening differ between term and preterm  
945 birth. *Endocrinology* 152, 1036–1046.
- House, M., Bhadelia, R., Myers, K., Socrate, S., 2009a. Magnetic resonance imaging of three-dimensional cervical anatomy in the second and third trimester. *Eur J Obstet Gynecol Reprod Biol* 144 Suppl 1, S65–9.
- House, M., Feltovich, H., Hall, T., Stack, T., Patels, A., Socrate, S., 2012.  
950 Three-dimensional, extended field-of-view ultrasound method for estimating large strain mechanical properties of the cervix during pregnancy. *Ultrason Imaging* 34, 1–14.
- House, M., Kaplan, D., Socrate, S., 2009b. Relationships between mechanical properties and extracellular matrix constituents of the cervical stroma during  
955 pregnancy. *Semin Perinatol* 33, 300–307.
- House, M., McCabe, R., Socrate, S., 2013. Using imaging-based, three-dimensional models of the cervix and uterus for studies of cervical changes during pregnancy. *Clinical anatomy (New York, N.Y.)* 26, 97–104.
- House, M., OCallaghan, M., Bahrami, S., Chelmow, D., Kini, J., Wu, D., Patz, S., Bhadelia, R., 2005. Magnetic resonance imaging of the cervix during  
960 pregnancy: Effect of gestational age and prior vaginal birth. *Am J Obstet Gynecol* 193, 1554–1560.
- House, M., Socrate, S., 2006. The cervix as a biomechanical structure. *Ultrasound Obstet Gynecol* 28, 745–749.

- 965 Hricak, H., Chang, Y.C., Cann, C.E., Parer, J.T., 1990. Cervical incompetence: preliminary evaluation with MR imaging. *Radiology* 174, 821–826.
- Iams, J.D., Berghella, V., 2010. Care for women with prior preterm birth. *Am J Obstet Gynecol* 203, 89–100.
- Iams, J.D., Goldenberg, R.L., Meis, P.J., Mercer, B.M., Moawad, A., Das, A.,  
970 Thom, E., McNellis, D., Copper, R.L., Johnson, F., Roberts, J.M., 1996. The length of the cervix and the risk of spontaneous premature delivery. National Institute of Child Health and Human Development Maternal Fetal Medicine Unit Network. *N Engl J Med* 334, 567–572.
- Insana, M.F., Wood, J.G., Hall, T.J., 1992. Identifying acoustic scattering  
975 sources in normal renal parenchyma *in vivo* by varying arterial and ureteral pressures. *Ultrasound Med Biol* 18, 587–599.
- Insana, M.F., Wood, J.G., Hall, T.J., Cox, G.G., Harrison, L.A., 1995. Effects of endothelin-1 on renal microvasculature measured using quantitative ultrasound. *Ultrasound Med Biol* 21, 1143–1151.
- 980 Labyed, Y., Bigelow, T.A., Mcfarlin, B.L., 2011. Estimate of the attenuation coefficient using a clinical array transducer for the detection of cervical ripening in human pregnancy. *Ultrasonics* 51, 34–39.
- Leppert, P., 1992. Cervical softening, effacement, and dilatation: a complex biochemical cascade. *J Matern Fetal Neonatal Med* 1, 213–223.
- 985 Leppert, P., 1995. Anatomy and physiology of cervical ripening. *Clin Obstet Gynecol* 38, 267–279.
- Leppert, P., 1998. The biochemistry and physiology of the uterine cervix during gestation and parturition. *Prenat Neonat Med* 3, 103–105.
- Liao, D., Hee, L., Sandager, P., Uldbjerg, N., Gregersen, H., 2014. Identification  
990 of biomechanical properties in vivo in human uterine cervix. *J Mech Behav Biomed Mater* 39, 27–37.

- Mahendroo, M., 2012. Cervical remodeling in term and preterm birth: insights from an animal model. *Reprod* 143, 429–438.
- Mahmoud, H., Wagoner Johnson, A., Chien, E.K., Poellmann, M.J., McFarlin, B., 2013. System-Level Biomechanical Approach for the Evaluation of Term and Preterm Pregnancy Maintenance. *J Biomech Eng* 135, 021009. 995
- Maldjian, C., Adam, R., Pelosi, M., 1999. MRI appearance of cervical incompetence in a pregnant patient. *Magn Reson Imaging* 17, 1399–1402.
- Martin, J., Hamilton, B., Ventura, S., Osterman, M., Mathews, T., 2013. Births: final data for 2011. *Natl Vital Stat Rep* 62, 1–90. 1000
- Marturano, J., Xylas, J., Sridharan, G., Georgakoudi, I., Kuo, C., 2014. *Acta Biomaterialia*. *Acta Biomater* 10, 1370–1379.
- Maurer, M., Badir, S., Bajka, M., Abitabile, P., Zimmermann, R., Mazza, E., . *In vivo* assessment of the biomechanical properties of the cervix: an analysis of available procedures. *submitted to J of Biomech Special Edition of Reproductive Biomechanics* . 1005
- Mazza, E., Nava, A., Bauer, M., Winter, R., Bajka, M., Holzapfel, G.A., 2006. Mechanical properties of the human uterine cervix: an in vivo study. *Med Image Anal* 10, 125–136.
- Mazza, E., Nava, A., Hahnloser, D., Jochum, W., Bajka, M., 2007. The mechanical response of human liver and its relation to histology: An in vivo study. *Med Image Anal* 11, 663–672. 1010
- Mazza, E., Parra-Saavedra, M., Bajka, M., Gratacos, E., Nicolaides, K., Deprest, J., 2013. In vivo assessment of the biomechanical properties of the uterine cervix in pregnancy. *Prenat Diagn* , 33–41. 1015
- McFarlin, B.L., Bigelow, T.A., Laybed, Y., O'Brien, W.D., Oelze, M.L., Abramowicz, J.S., 2010. Ultrasonic attenuation estimation of the pregnant cervix: a preliminary report. *Ultrasound Obstet Gynecol* 36, 218–225.

- Molina, F.S., Gómez, L.F., Florido, J., Padilla, M.C., Nicolaides, K.H., 2012.  
1020 Quantification of cervical elastography: a reproducibility study. *Ultrasound  
Obst Gynecol* 39, 685–689.
- Mottley, J.G., Miller, J.G., 1990. Anisotropy of the ultrasonic attenuation in  
soft tissues: measurements in vitro. *J Acoust Soc Am* 88, 1203–1210.
- Myers, K., Ateshian, G., 2014. Interstitial growth and remodeling of biological  
1025 tissues: Tissue composition as state variables. *J Mech Behav Biomed Mater*  
29, 544–556.
- Myers, K., Hendon, C., Gan, Y., Yao, W., Vink, J., Wapner, R., 2015. A  
Continuous Fiber Distribution Material Model for Human Cervical Tissue.  
*accepted to J of Biomech Special Edition of Reproductive Biomechanics* .
- 1030 Myers, K., Paskaleva, A., House, M., Socrate, S., 2008. Mechanical and bio-  
chemical properties of human cervical tissue. *Acta Biomater* 4, 104–116.
- Myers, K., Socrate, S., Paskaleva, A., House, M., 2010. A study of the anisotropy  
and tension/compression behavior of human cervical tissue. *J Biomech Eng*  
132, 021003.
- 1035 Myers, K., Socrate, S., Tzeranis, D., House, M., 2009. Changes in the biochem-  
ical constituents and morphologic appearance of the human cervical stroma  
during pregnancy. *Eur J Obstet Gynecol Reprod Biol* 144 Suppl 1, S82–9.
- Nam, K., Rosado-Mendez, I.M., Wirtzfeld, L.A., Ghoshal, G., Pawlicki, A.D.,  
Madsen, E.L., Lavarello, R.J., Oelze, M.L., Zagzebski, J.A., O'Brien, W.D.,  
1040 Hall, T.J., 2012a. Comparison of ultrasound attenuation and backscatter  
estimates in layered tissue-mimicking phantoms among three clinical scanners.  
*Ultrasonic Imag* 34, 209–221.
- Nam, K., Rosado-Mendez, I.M., Wirtzfeld, L.A., Kumar, V., Madsen, E.L.,  
Ghoshal, G., Pawlicki, A.D., Oelze, M.L., Lavarello, R.J., Bigelow, T.A., Za-  
1045 gzebski, J.A., O'Brien, W.D., Hall, T.J., 2012b. Cross-imaging system com-



- parison of backscatter coefficient estimates from a tissue-mimicking material.  
J Acoust Soc Am 132, 1319–1324.
- Nam, K., Rosado-Mendez, I.M., Wirtzfeld, L.A., Pawlicki, A.D., Kumar, V.,  
Madsen, E.L., Ghoshal, G., Lavarello, R.J., Oelze, M.L., Bigelow, T.A., Za-  
1050 gzebski, J.A., O’Brien, W.D., Hall, T.J., 2011. Ultrasonic attenuation and  
backscatter coefficient estimates of rodent-tumor-mimicking structures: com-  
parison of results among clinical scanners. *Ultrasonic Imag* 33, 233–250.
- Nassiri, D.K., Nicholas, D., Hill, C.R., 1979. Attenuation of ultrasound in  
skeletal muscle. *Ultrasonics* 17, 230–232.
- 1055 Norman, J.E., Shennan, A.H., 2013. Prevention of preterm birth—why can’t  
we do any better? *The Lancet* 381, 184–185.
- Osmers, R., Rath, W., Pflanz, M.A., Kuhn, W., Stuhlsatz, H.W., Szeverényi,  
M., 1993. Glycosaminoglycans in cervical connective tissue during pregnancy  
and parturition. *Obstet Gynecol* 81, 88–92.
- 1060 Oxlund, B.S., Ørtoft, G., Brüel, A., Danielsen, C., Oxlund, H., Uldbjerg, N.,  
2010a. Cervical collagen and biomechanical strength in non-pregnant women  
with a history of cervical insufficiency. *Reprod Biol Endocrinol* 8, 92.
- Oxlund, B.S., Ørtoft, G., Brüel, A., Danielsen, C.C., Bor, P., Oxlund, H.,  
Uldbjerg, N., 2010b. Collagen concentration and biomechanical properties of  
1065 samples from the lower uterine cervix in relation to age and parity in non-  
pregnant women. *Reprod Biol Endocrinol* 8, 82.
- Palmeri, M., Feltovich, H., Homyk, A., Carlson, L., Hall, T., 2013. Evaluating  
the feasibility of acoustic radiation force impulse shear wave elasticity imaging  
of the uterine cervix with an intracavity array: a simulation study, in: *IEEE*  
1070 *Trans Ultrason Ferroelectr Freq Control*, pp. 2053–2064.
- Parra-Saavedra, M., Gómez, L., Barrero, A., Parra, G., Vergara, F., Navarro,  
E., 2011. Prediction of preterm birth using the cervical consistency index.  
*Ultrasound Obstet Gynecol* 38, 44–51.

- 1075 Paskaleva, A., 2007. Biomechanics of Cervical Function in Pregnancy - Case of Cervical Insufficiency. Ph.D. thesis. MIT.
- Petersen, L.K., Oxlund, H., Uldbjerg, N., Forman, A., 1991. In vitro analysis of muscular contractile ability and passive biomechanical properties of uterine cervical samples from nonpregnant women. *Obstet Gynecol* 77, 772–776.
- Ramanah, R., Berger, M.B., Chen, L., Riethmuller, D., DeLancey, J.O.L., 2012. See it in 3D! Researchers examined structural links between the cardinal and uterosacral ligaments. *Am J Obstet Gynecol* 207, 437.e1–437.e7.
- 1080 Read, C.P., Word, R.A., Ruscheinsky, M.A., Timmons, B.C., Mahendroo, M.S., 2007. Cervical remodeling during pregnancy and parturition: molecular characterization of the softening phase in mice. *Reprod* 134, 327–340.
- 1085 Rechberger, T., Uldbjerg, N., Oxlund, H., 1988. Connective tissue changes in the cervix during normal pregnancy and pregnancy complicated by cervical incompetence. *Obstet Gynecol* 71, 563–567.
- Schoen, C.N., Tabbah, S., Iams, J.D., Caughey, A.B., Berghella, V., 2014. Why the united states preterm birth rate is declining. *Am J Obstet Gynecol*, epub ahead of print.
- 1090 Shimizu, T., Endo, M., Yosizawa, Z., 1980. Glycoconjugates (glycosaminoglycans and glycoproteins) and glycogen in the human cervix uteri. *Tohoku J Exp Med* 131, 289–299.
- Society for Maternal-Fetal Medicine Publications Committee, 2012. Progesterone and preterm birth prevention: translating clinical trials data into clinical practice. *Am J Obstet Gynecol* 206, 376–386.
- 1095 Solomon, C., Iams, J., 2014. Prevention of Preterm Parturition. *N Engl J Med*. 370, 254–261.
- 1100 Swiatkowska-Freund, M., Preis, K., 2011. Elastography of the uterine cervix: implications for success of induction of labor. *Ultrasound in Obstet Gynecol* 38, 52–56.

- Timmons, B., Akins, M., Mahendroo, M., 2010a. Cervical remodeling during pregnancy and parturition. *Trends Endocrinol Metab* 21, 353–361.
- Timmons, B., Akins, M., Mahendroo, M., 2010b. Cervical remodeling during pregnancy and parturition. *Trends Endocrin Met* 21, 353–361. 1105
- To, M.S., Skentou, C., Liao, A.W., Cacho, A., Nicolaides, K.H., 2001. Cervical length and funneling at 23 weeks of gestation in the prediction of spontaneous early preterm delivery. *Ultrasound Obstet Gynecol* 18, 200–203.
- Topp, K.A., O’Brien, W.D., 2000. Anisotropy of ultrasonic propagation and scattering properties in fresh rat skeletal muscle in vitro. *J Acoust Soc Am* 107, 1027–1033. 1110
- Uldbjerg, N., Ekman, G., Malmstrom, A., Olsson, K., Ulmsten, U., 1983. Ripening of the human uterine cervix related to changes in collagen, glycosaminoglycans, and collagenolytic activity. *Am J Obstet Gynecol* 147, 662–666.
- Weiss, S., Jaermann, T., Schmid, P., Staempfli, P., Boesiger, P., Niederer, P., Caduff, R., Bajka, M., 2006. Three-dimensional fiber architecture of the non-pregnant human uterus determined ex vivo using magnetic resonance diffusion tensor imaging. *Anat Rec Part A* 288, 84–90. 1115
- Wirtzfeld, L.A., Ghoshal, G., Hafez, Z.T., Nam, K., Labyed, Y., Anderson, J.J., Herd, M.T., Haak, A., He, Z., Miller, R.J., Sarwate, S., Simpson, D.G., Zagzebski, J.A., Bigelow, T.A., Oelze, M.L., Hall, T.J., O’Brien, W.D., 2010. Cross-imaging platform comparison of ultrasonic backscatter coefficient measurements of live rat tumors. *J Ultrasound Med* 29, 1117–1123. 1120
- Wirtzfeld, L.A., Ghoshal, G., Rosado-Mendez, I.M., Nam, K., Park, Y., Pawlicki, A.D., Miller, R., Simpson, D.G., Zagzebski, J.A., Oelze, M.L., Hall, T.J., O’Brien, W., . Quantitative ultrasound comparison of MAT and 4T1 mammary 1 tumors in mice and rats across multiple imaging systems. *accepted Nov. 2014 to J Ultrasound Med* . 1125

- Wirtzfeld, L.A., Nam, K., Labyed, Y., Ghoshal, G., Haak, A., Sen-Gupta, E.,  
1130 He, Z., Hirtz, N.R., Miller, R.J., Sarwate, S., Simpson, D.G., Zagzebski, J.A.,  
Bigelow, T.A., Oelze, M.L., Hall, T.J., O'Brien, W.D., 2013. Techniques and  
evaluation from a cross-platform imaging comparison of quantitative ultra-  
sound parameters in an in vivo rodent fibroadenoma model. *IEEE Trans  
Ultrason Ferroelectr Freq Control* 60, 1386–1400.
- 1135 Word, R.A., Li, X., Hnat, M., Carrick, K., 2007. Dynamics of cervical remodel-  
ing during pregnancy and parturition: mechanisms and current concepts.  
*Semin Reprod Med* 25, 69–79.
- World Health Organization, 2014. World health organization fact sheet no.363,  
updated nov. 17th, 2014. [http://www.who.int/mediacentre/factsheets/  
1140 fs363/en/](http://www.who.int/mediacentre/factsheets/fs363/en/). Accessed: 12-03-2014.
- Yao, W., Yoshida, K., Fernandez, M., Vink, J., Wapner, R., Ananth, C., Oyen,  
M., Myers, K., 2014. Measuring the compressive viscoelastic mechanical prop-  
erties of human cervical tissue using indentation. *J Mech Behav Biomed Mater*  
34, 18–26.
- 1145 Yoshida, K., Jiang, H., Kim, M., Vink, J., Cremers, S., Paik, D., Wapner,  
R., Mahendroo, M., Myers, K., 2014a. Quantitative Evaluation of Collagen  
Crosslinks and Corresponding Tensile Mechanical Properties in Mouse Cer-  
vical Tissue during Normal Pregnancy. *PLoS ONE* 9, e112391.
- Yoshida, K., Reeves, C., Vink, J., Kitajewski, J., Wapner, R., Jiang, H., Cre-  
1150 mers, S., Myers, K., 2014b. Cervical Collagen Network Remodeling in Normal  
Pregnancy and Disrupted Parturition in *Antxr2* Deficient Mice. *J Biomech  
Eng* 136, 021017.
- Zilianti, M., Azuaga, A., Calderon, F., Pagés, G., Mendoza, G., 1995. Monitor-  
ing the effacement of the uterine cervix by transperineal sonography: a new  
1155 perspective. *J Ultrasound Med* 14, 719–724.

Zork, N.M., Myers, K.M., Yoshida, K., Cremers, S., Jiang, H., Ananth, C.V., Wapner, R.J., Kitajewski, J., Vink, J., 2014. A systematic evaluation of collagen cross-links in the human cervix. *Am J Obstet Gynecol* URL: <http://eutils.ncbi.nlm.nih.gov/entrez/eutils/elink.fcgi?dbfrom=pubmed&id=25281365&retmode=ref&cmd=prlinks>, doi:10.1016/j.ajog.2014.09.036.

### List of Tables

1 Cervical tissue tensile tangent moduli from uni-axial *ex vivo* mechanical tests. The strain level reported is location of the tangent moduli. PG=pregnant, NP=nonpregnant, ex.=external, int.=internal, circ=circumferential, long.=longitudinal, PGE<sub>2</sub>=Prostaglandin E<sub>2</sub>, CI=cervical insufficiency, instan=instantaneous, eq=equilibrium. 45

### List of Figures

1 Biological length scales in the human cervix: A) The location of the uterine cervix based on segmentation of magnetic resonance imaging (MRI) data of a 20 week pregnant patient (Fernandez et al., 2015) B) Collagen fiber directionality of an axial slice of a nonpregnant (NP) cervix imaged via optical coherence tomography (Gan et al., 2014), C) NP cervical collagen fiber imaged via second harmonic generation (Myers et al., 2009), D) NP cervical crosslink density (mole-per-mole basis with collagen) content, pyridinoline (PYD), deoxypyridinoline (DPD), dihydroxylysinoxylorleucine (DHLNL), pentosidine [PEN] (Zork et al., 2014). 46

|   |                                                                                                                                                                                                                                                                                                                                                                                                                                                                                                                                                                                                                          |    |
|---|--------------------------------------------------------------------------------------------------------------------------------------------------------------------------------------------------------------------------------------------------------------------------------------------------------------------------------------------------------------------------------------------------------------------------------------------------------------------------------------------------------------------------------------------------------------------------------------------------------------------------|----|
| 2 | Cervical deformation patterns and clinical definitions: Cervical length is clinically measured as the portion of the cervix that is closed. Effacement progresses in normal pregnancy when the fetal head descends and shortens the cervix. Funneling is a pathologic condition related to an abnormal cervical deformation pattern when the membranes slip into the inner canal and the cervix prematurely shortens. . . . .                                                                                                                                                                                            | 46 |
| 3 | Closure pressure $p_{cl}$ of nonpregnant (NP), pregnant (months 2 to 9, n=50) and post-partum (PP) patients are shown as vertical bars, crosses indicate cervical length (CL, second vertical axis). Standard deviations are indicated as vertical lines. On the right: maximum logarithmic strains (LE) in the aspiration experiment calculated by finite element analysis (axisymmetric model with a neo-Hookean material, from (Badir et al., 2013a), with the aspirated tissue in the middle and the aspirator edge as horizontal line next to it). Reproduced with permission from (Badir et al., 2013a,b). . . . . | 47 |

|   |                                                                                                                                                                                                                                                                                                                                                                                                                                                                                                                                                                                                                                                                                                                                                                                                                                                                                                                                                                                                                                               |    |
|---|-----------------------------------------------------------------------------------------------------------------------------------------------------------------------------------------------------------------------------------------------------------------------------------------------------------------------------------------------------------------------------------------------------------------------------------------------------------------------------------------------------------------------------------------------------------------------------------------------------------------------------------------------------------------------------------------------------------------------------------------------------------------------------------------------------------------------------------------------------------------------------------------------------------------------------------------------------------------------------------------------------------------------------------------------|----|
| 4 | Comparing fiber composite material models proposed in (Liao et al., 2014; Myers et al., 2015) for the human cervix. Principal strain magnitude and directionality are calculated within a thick-walled cylinder (inner radius=8 mm, outer radius=28 mm, length=38 mm) under compressive longitudinal pressure for an elliptically-shaped continuous fiber distribution (EFD) material model (Myers et al., 2015) fit to NP and PG <i>ex vivo</i> mechanical data and a 3-fiber family model fit to PG <i>in vivo</i> pressure-dilation data (Liao et al., 2014). The EFD material produces a more uniform strain pattern compared to the 3-fiber family model, where the 3-fiber family model produces a twist of the cylinder under uniform compression. The two models predict similar levels of longitudinal compression for the term pregnant condition. However, the two models predict different patterns of strain, where the 3-fiber family model produces a larger gradient of strain through the thickness of the cylinder. . . . . | 48 |
|---|-----------------------------------------------------------------------------------------------------------------------------------------------------------------------------------------------------------------------------------------------------------------------------------------------------------------------------------------------------------------------------------------------------------------------------------------------------------------------------------------------------------------------------------------------------------------------------------------------------------------------------------------------------------------------------------------------------------------------------------------------------------------------------------------------------------------------------------------------------------------------------------------------------------------------------------------------------------------------------------------------------------------------------------------------|----|

| Reference                                           | Specimen Description                                                                   | Strain Rate<br>Strain Level                       | Tang<br>Modulus                                    |
|-----------------------------------------------------|----------------------------------------------------------------------------------------|---------------------------------------------------|----------------------------------------------------|
| Conrad & Ueland<br>1976 (Conrad and Ueland, 1976)   | NP & PG Term<br>ex. os biopsy (5x10 mm)                                                | rate: 0.22%/s<br>level: 0.8                       | NP: 0<br>PG: 0                                     |
| Conrad & Ueland<br>1979 (Conrad and Ueland, 1979)   | PG Term Non-treated<br>PG Term Oxytocin- & PGE <sub>2</sub> -treated<br>ex. os biopsy  | rate: 0.22%/s                                     | PG: 0<br>PG Oxyto<br>PG PGE                        |
| Conrad et al.<br>1980 (Conrad et al., 1980)         | NP int. os<br>rectangular circ. strips<br>in 3 radial zones                            | not given                                         | NP inner<br>NP middle<br>NP outer                  |
| Rechberger et al.<br>1988 (Rechberger et al., 1988) | NP & PG at post partum<br>ex. os biopsy (2x2x12 mm)                                    | rate: 1.11%/s<br>level NP: 0.61<br>level PG: 0.93 | NP inne<br>PG: 1                                   |
| Petersen et al.<br>1991 (Petersen et al., 1991)     | NP int. and ex. os<br>biopsy taken in<br>circ. & long. directions<br>(1-2x10 mm)       | rate: 5.55%/s<br>strain: level: 0.7               | NP int os<br>NP int os<br>NP ex. os c<br>NP ex. os |
| Oxlund et al.<br>2010 (Oxlund et al., 2010a,b)      | NP with and w/out history of CI<br>ex. os biopsy<br>taken in long. direction (2x15 mm) | rate: 4.17%/s<br>level: 0.49                      | NP no hist<br>NP w/ history                        |
| Myers et al.<br>2010 (Myers et al., 2010)           | NP & PG Term<br>rectangular circ. strips (2x4x10 mm)                                   | rate: 0.1%/s<br>level NP: 0.25<br>level PG: 0.35  | NP instan: 0.8<br>PG instan: 0.0                   |

Table 1: Cervical tissue tensile tangent moduli from uni-axial *ex vivo* mechanical tests. The strain level reported is location of the tangent moduli. PG=pregnant, NP=nonpregnant, ex.=external, int.=internal, circ=circumferential, long.=longitudinal, PGE<sub>2</sub>=Prostaglandin E<sub>2</sub>, CI=cervical insufficiency, instan=instantaneous, eq=equilibrium.



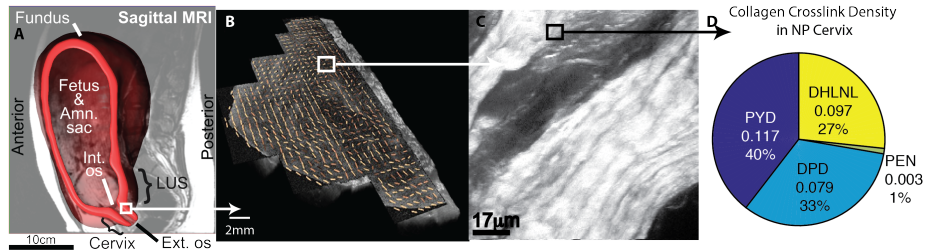

Figure 1: Biological length scales in the human cervix: A) The location of the uterine cervix based on segmentation of magnetic resonance imaging (MRI) data of a 20 week pregnant patient (Fernandez et al., 2015) B) Collagen fiber directionality of an axial slice of a nonpregnant (NP) cervix imaged via optical coherence tomography (Gan et al., 2014), C) NP cervical collagen fiber imaged via second harmonic generation (Myers et al., 2009), D) NP cervical crosslink density (mole-per-mole basis with collagen) content, pyridinoline (PYD), deoxypyridinoline (DPD), dihydroxylysinoxonoleucine (DHLNL), pentosidine [PEN] (Zork et al., 2014).

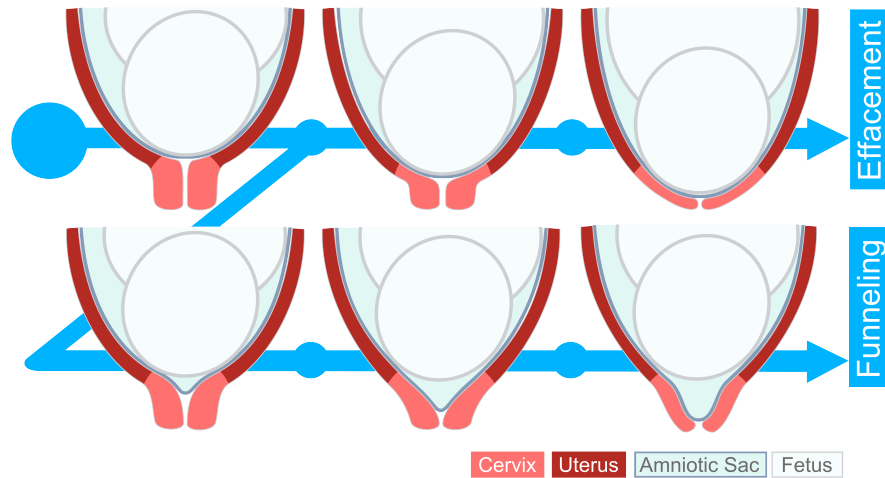

Figure 2: Cervical deformation patterns and clinical definitions: Cervical length is clinically measured as the portion of the cervix that is closed. Effacement progresses in normal pregnancy when the fetal head descends and shortens the cervix. Funneling is a pathologic condition related to an abnormal cervical deformation pattern when the membranes slip into the inner canal and the cervix prematurely shortens.

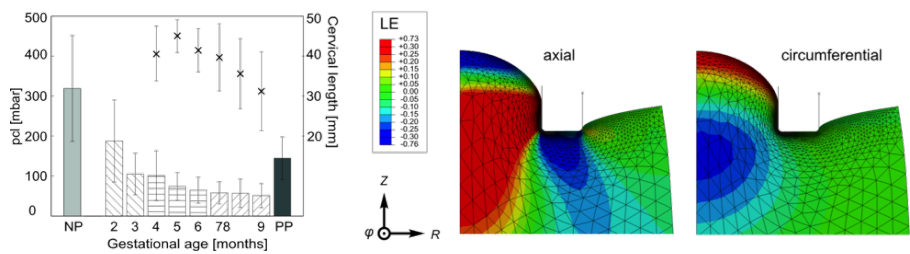

Figure 3: Closure pressure  $p_{cl}$  of nonpregnant (NP), pregnant (months 2 to 9,  $n=50$ ) and postpartum (PP) patients are shown as vertical bars, crosses indicate cervical length (CL, second vertical axis). Standard deviations are indicated as vertical lines. On the right: maximum logarithmic strains (LE) in the aspiration experiment calculated by finite element analysis (axisymmetric model with a neo-Hookean material, from (Badir et al., 2013a), with the aspirated tissue in the middle and the aspirator edge as horizontal line next to it). Reproduced with permission from (Badir et al., 2013a,b).

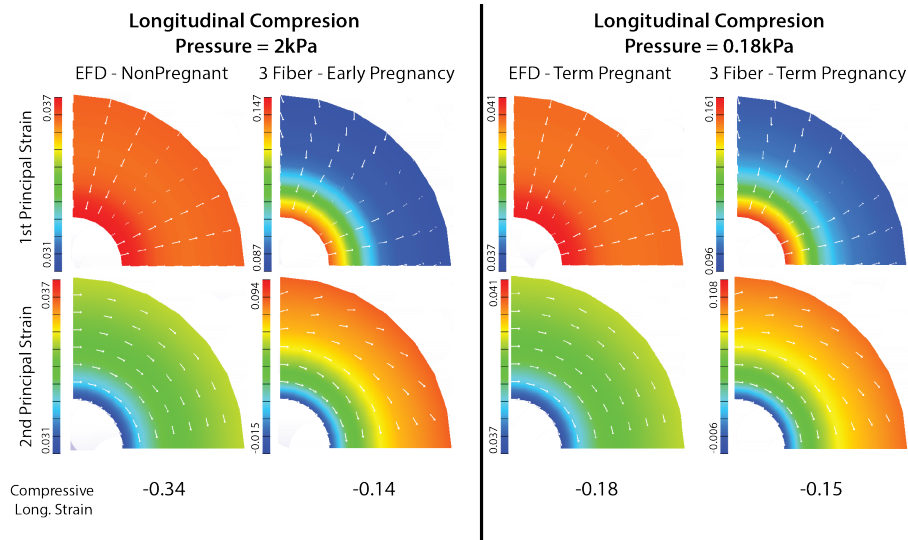

Figure 4: Comparing fiber composite material models proposed in (Liao et al., 2014; Myers et al., 2015) for the human cervix. Principal strain magnitude and directionality are calculated within a thick-walled cylinder (inner radius=8 mm, outer radius=28 mm, length=38 mm) under compressive longitudinal pressure for an elliptically-shaped continuous fiber distribution (EFD) material model (Myers et al., 2015) fit to NP and PG *ex vivo* mechanical data and a 3-fiber family model fit to PG *in vivo* pressure-dilation data (Liao et al., 2014). The EFD material produces a more uniform strain pattern compared to the 3-fiber family model, where the 3-fiber family model produces a twist of the cylinder under uniform compression. The two models predict similar levels of longitudinal compression for the term pregnant condition. However, the two models predict different patterns of strain, where the 3-fiber family model produces a larger gradient of strain through the thickness of the cylinder.

Figure 1  
[Click here to download high resolution image](#)

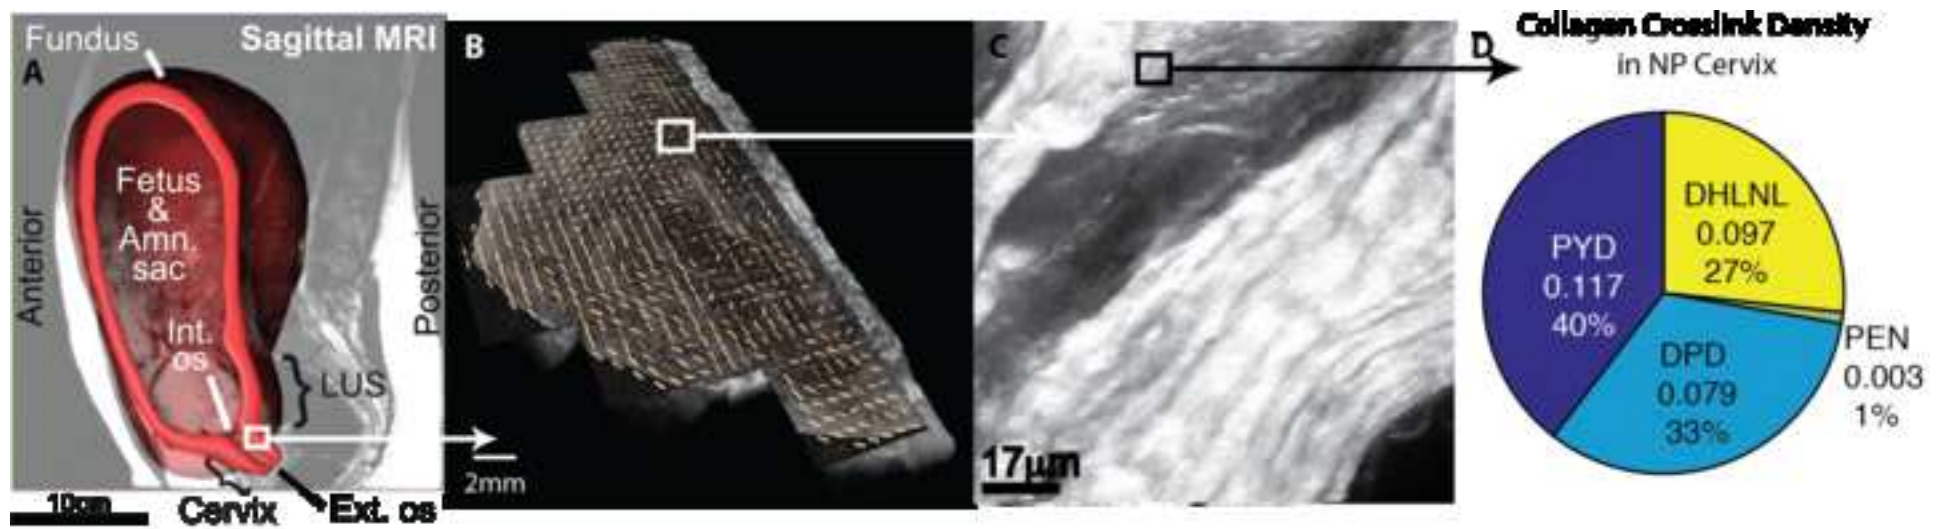

Figure 2  
[Click here to download high resolution image](#)

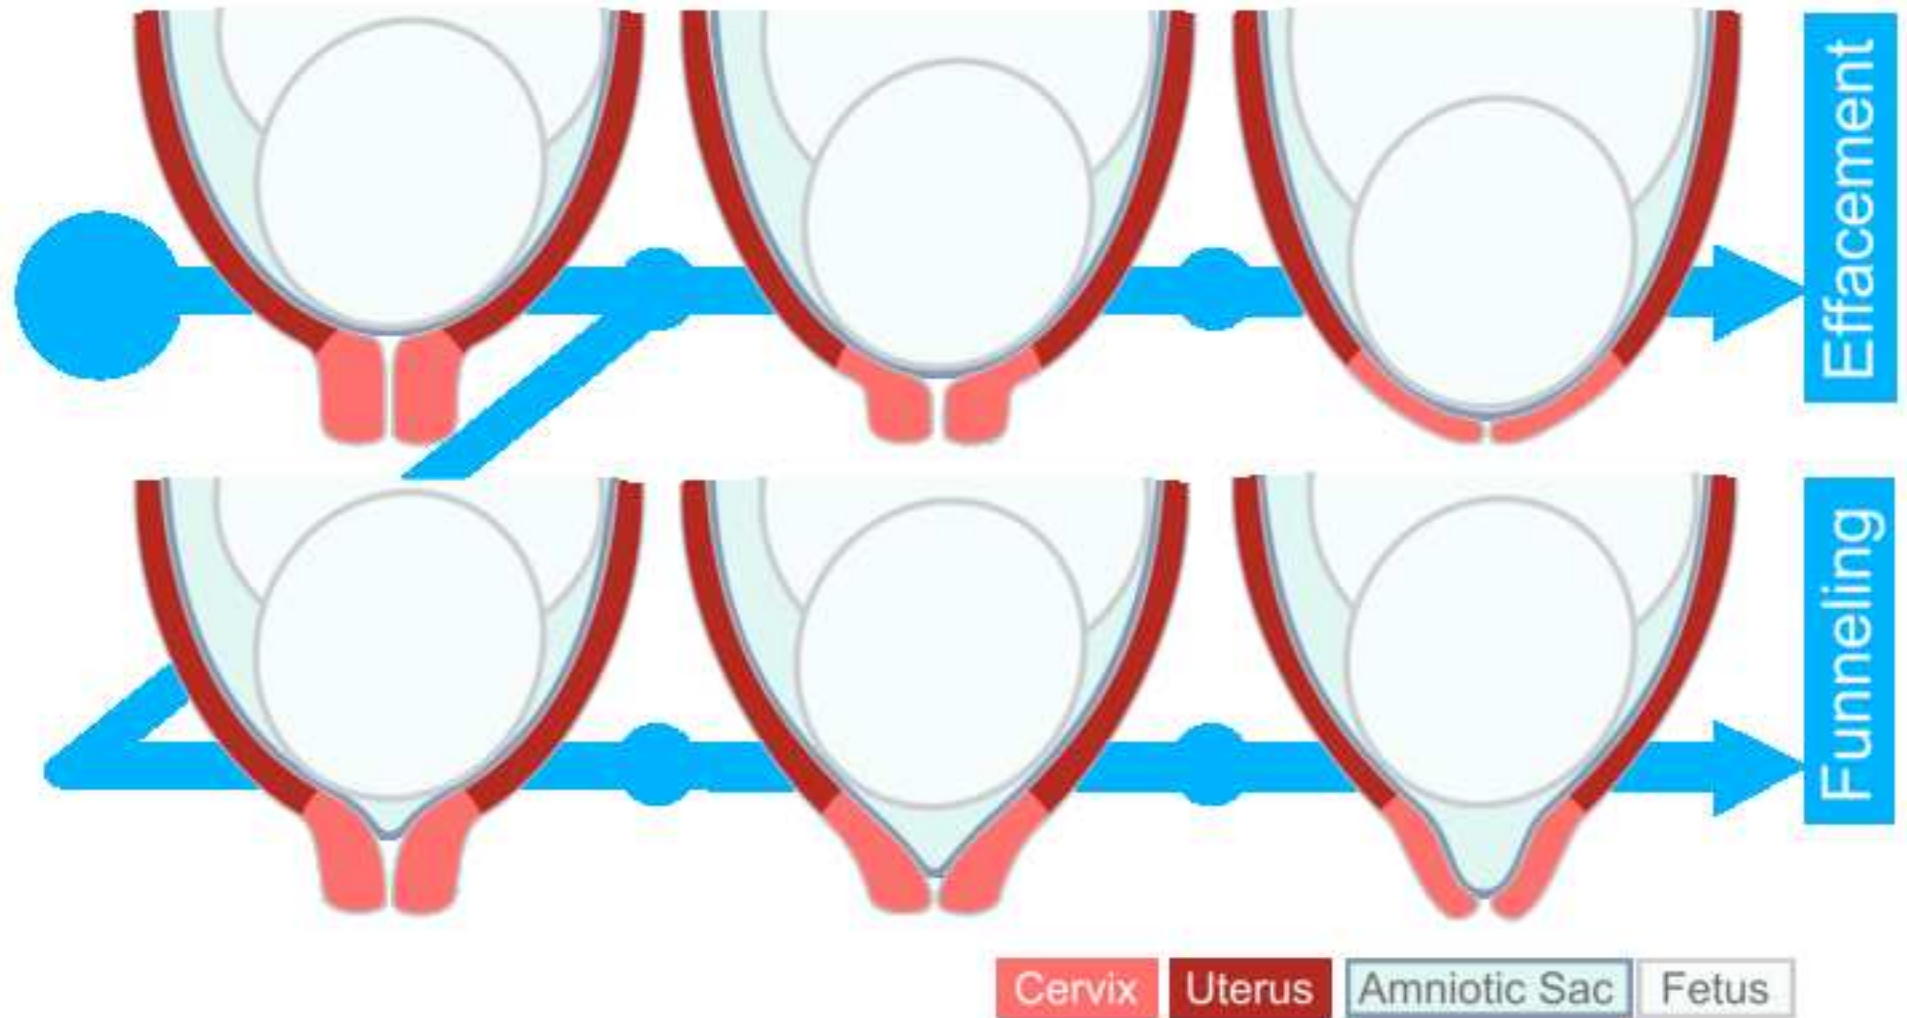

Figure 3  
[Click here to download high resolution image](#)

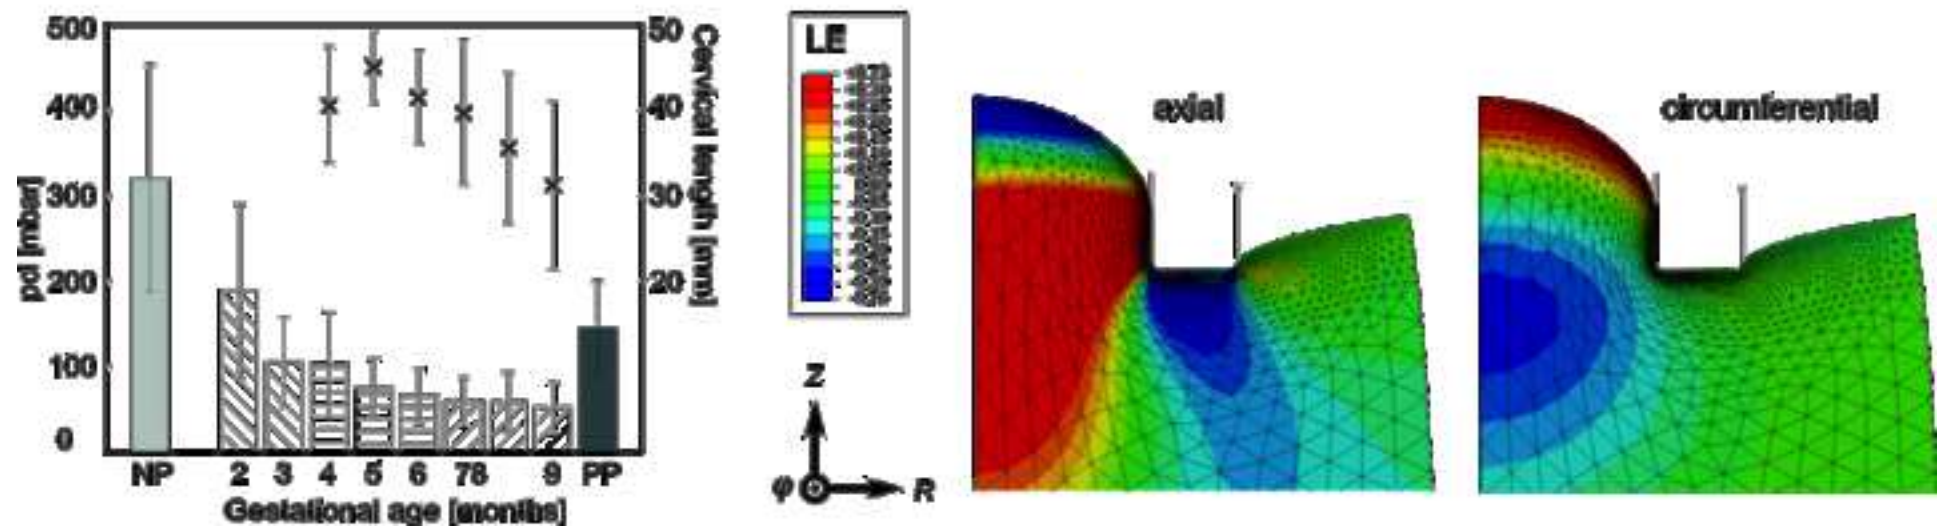



Figure 4  
[Click here to download high resolution image](#)

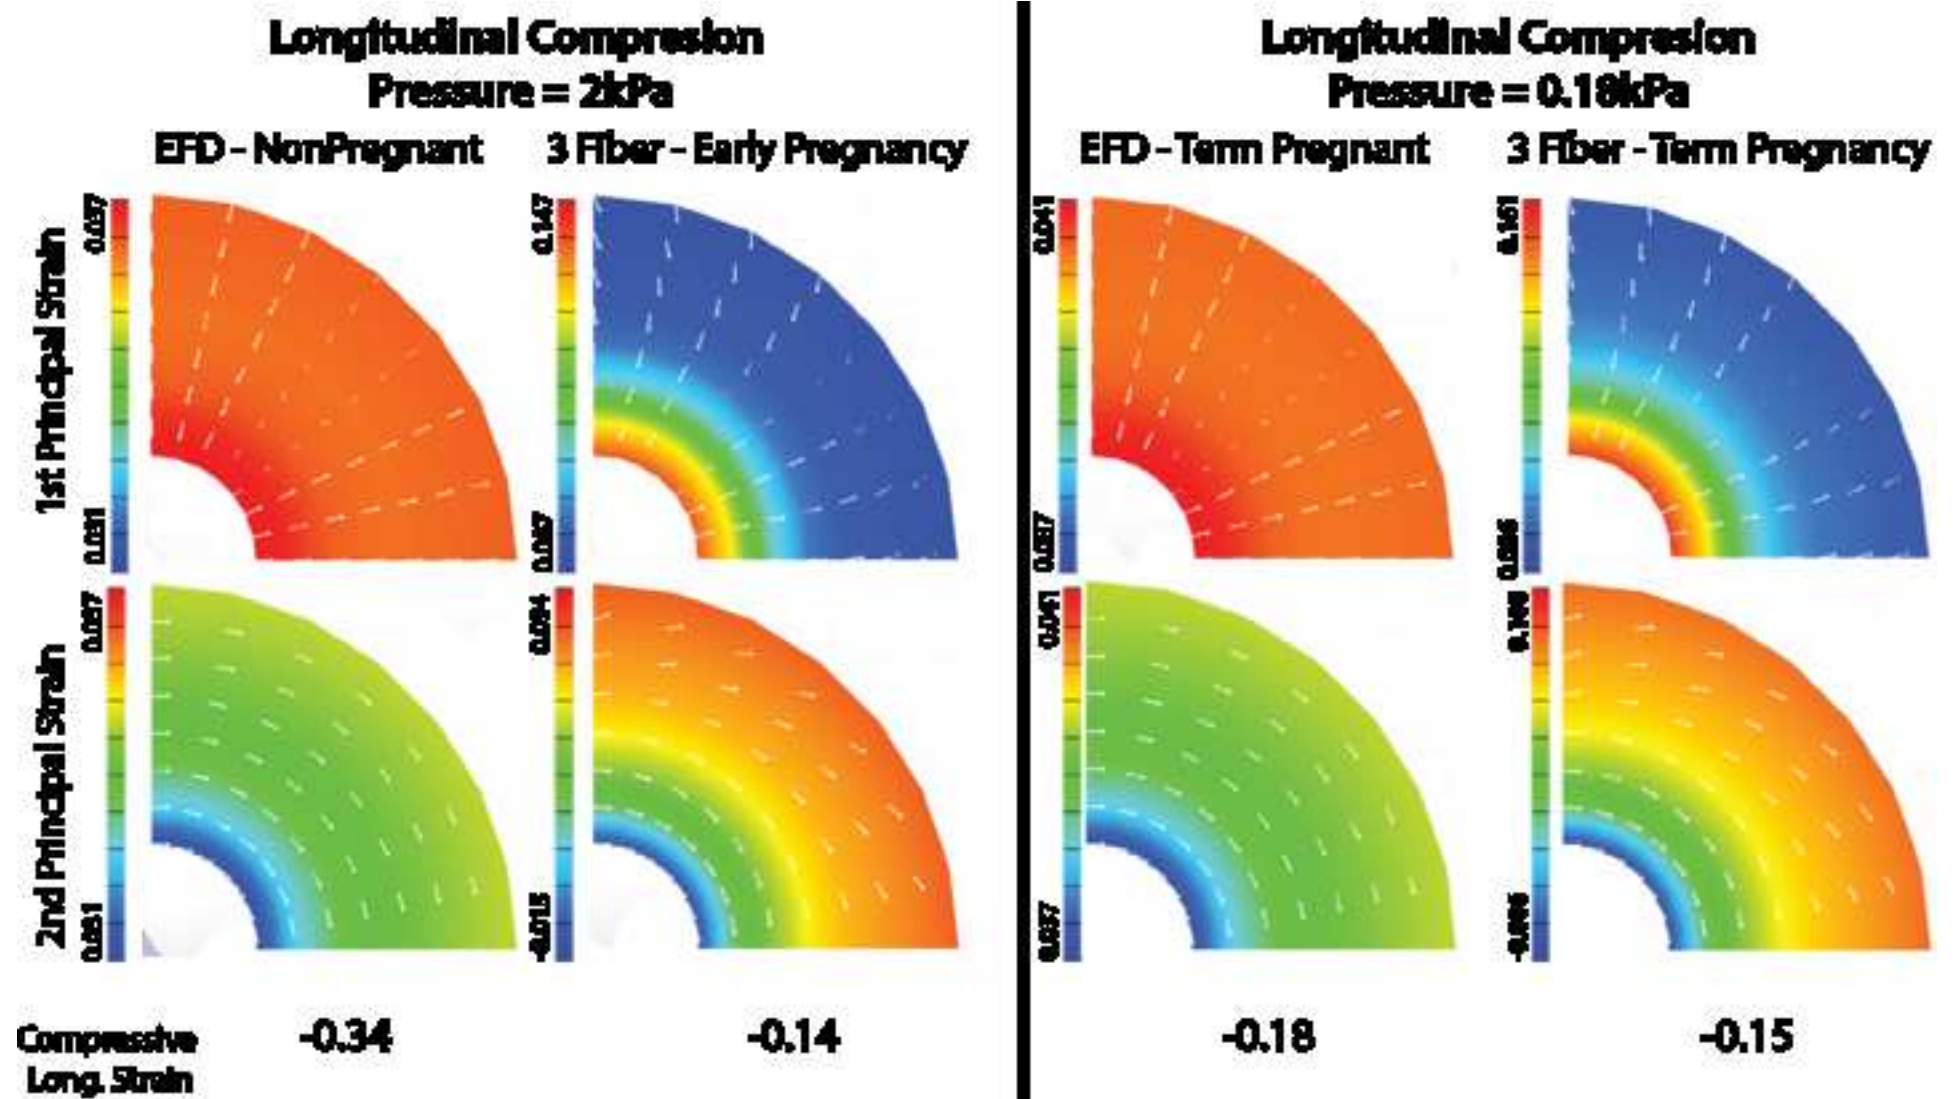

| Reference                                           | Specimen Description                                                                   | Strain Rate<br>Strain Level                        | Tangent Modulus [MPa]                                                                      |
|-----------------------------------------------------|----------------------------------------------------------------------------------------|----------------------------------------------------|--------------------------------------------------------------------------------------------|
| Conrad & Ueland<br>1976 (Conrad and Ueland, 1976)   | NP & PG Term<br>ex. os biopsy (5x10 mm)                                                | rate: 0.22 %/s<br>level: 0.8                       | NP: 0.055<br>PG: 0.021                                                                     |
| Conrad & Ueland<br>1979 (Conrad and Ueland, 1979)   | PG Term Non-treated<br>PG Term Oxytocin- & PGE <sub>2</sub> -treated<br>ex. os biopsy  | rate: 0.22 %/s                                     | PG: 0.027<br>PG Oxytocin: 0.029<br>PG PGE <sub>2</sub> : 0.015                             |
| Conrad et al.<br>1980 (Conrad et al., 1980)         | NP int. os<br>rectangular circ. strips<br>in 3 radial zones                            | not given                                          | NP inner: 0.0643<br>NP middle: 0.0413<br>NP outer: 0.0242                                  |
| Rechberger et al.<br>1988 (Rechberger et al., 1988) | NP & PG at post partum<br>ex. os biopsy (2x2x12 mm)                                    | rate: 1.11 %/s<br>level NP: 0.61<br>level PG: 0.93 | NP inner: 40.3<br>PG: 1.84                                                                 |
| Petersen et al.<br>1991 (Petersen et al., 1991)     | NP int. and ex. os<br>biopsy taken in<br>circ. & long. directions<br>(1-2x10 mm)       | rate: 5.55 %/s<br>strain: level: 0.7               | NP int os circum: 4<br>NP int os long: 3.9<br>NP ex. os circum: 3.6<br>NP ex. os long: 3.2 |
| Oxlund et al.<br>2010 (Oxlund et al., 2010a,b)      | NP with and w/out history of CI<br>ex. os biopsy<br>taken in long. direction (2x15 mm) | rate: 4.17 %/s<br>level: 0.49                      | NP no history: 5.33<br>NP w/ history of CI: 5.41                                           |
| Myers et al.<br>2010 (Myers et al., 2010)           | NP & PG Term<br>rectangular circ. strips (2x4x10 mm)                                   | rate: 0.1 %/s<br>level NP: 0.25<br>level PG: 0.35  | NP instan: 0.837 eq: 0.554<br>PG instan: 0.003 eq: 0.003                                   |

Table 1: Cervical tissue tensile tangent moduli from uni-axial *ex vivo* mechanical tests. The strain level reported is location of the tangent moduli. PG=pregnant, NP=nonpregnant, ex.=external, int.=internal, circ=circumferential, long.=longitudinal, PGE<sub>2</sub>=Prostaglandin E<sub>2</sub>, CI=cervical insufficiency, instan=instantaneous, eq=equilibrium.



**Supplementary Material**

[Click here to download Supplementary Material: kmyersPermission.pdf](#)

**Supplementary Material**

[Click here to download Supplementary Material: Rightslink Printable License\\_Fig3Mazza.pdf](#)

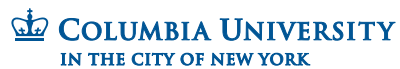

**Department of Mechanical Engineering**  
The Fu Foundation  
School of Engineering & Applied Science  
234 S. W. Mudd Hall, Mail Code 4703  
500 West 120th Street  
New York, New York 10027

**Kristin M. Myers, Ph.D.**  
*Assistant Professor*  
Phone: (212) 854-2957  
Fax: (212) 854-3304  
e-mail: [kmm2233@columbia.edu](mailto:kmm2233@columbia.edu)

February 20, 2015

To Whom It May Concern:

Enclosed, please find our manuscript for a research article entitled *A Continuous Fiber Distribution Material Model for Human Cervical Tissue*, which is co-authored by Christine Hendon, Yu Gan, Wang Yao, Kyoko Yoshida, Michael Fernandez, Joy Vink, and Ronald Wapner. The co-authors and I have no conflict of interests to report.

Sincerely,

A handwritten signature in black ink, appearing to read "Kristin M. Myers". The signature is fluid and cursive, with a long horizontal flourish extending to the right.

Kristin M. Myers, Ph.D.

**LaTeX Source Files**

[Click here to download LaTeX Source Files: kmyersLatexfiles.zip](#)
